1 **Maternally derived sex steroid hormones impact sex ratios of loggerhead sea turtles**

2

3 **Authors:** Emma C. Lockley<sup>1\*</sup>, Thomas Reischig<sup>2</sup>, Christophe Eizaguirre<sup>1</sup>

4 <sup>1</sup>Queen Mary University of London, School of Biological and Chemical Sciences, Mile End  
5 Road, London E14NS, United Kingdom.

6 <sup>2</sup>Turtle Foundation, An der Eiche 7a, 50678 Cologne, Germany.

7 **Corresponding Author:** Emma Lockley, Queen Mary University of London, School of  
8 Biological and Chemical Sciences, Mile End Road, London E14NS, United Kingdom.  
9 emma.lockley@qmul.ac.uk

10

11 **Classification:** Biological Sciences

12 **Sub-Classification:** Evolution

13

14

15

16

17 **Keywords:**

18 Temperature-dependent sex determination, Maternal effects, Loggerhead sea turtle, Hormone  
19 transfer, Conservation, Climate Change

20 **Abstract**

21 Global warming could drive species with temperature-dependent sex determination to  
22 extinction by persistently skewing offspring sex ratios. Evolved mechanisms that buffer these  
23 biases are therefore paramount for their persistence. Here, we tested whether maternally-  
24 derived sex steroid hormones affect the sex-determination cascade and provide a  
25 physiological mechanism to buffer sex ratio bias in the endangered loggerhead sea turtle  
26 (*Caretta caretta*). We quantified estradiol and testosterone in nesting females and their egg  
27 yolks at oviposition, before incubating nests in situ at standardised temperatures. Upon  
28 hatchling emergence, we developed a new, non-lethal method to establish the sex of  
29 individuals. Despite standardised incubation temperatures, sex ratios varied widely among  
30 nests, correlating non-linearly with the estradiol:testosterone ratio in egg yolks. Males were  
31 produced at an equal ratio, with females produced either side of this optimum. This result  
32 provides evidence that maternal hormone transfer forms a physiological mechanism that  
33 impacts sex determination in this endangered species.

## 34 Introduction

35 Fifty years after the discovery of environmental sex determination, our understanding of its  
36 evolutionary significance, underlying mechanisms and ecological consequences in the light of  
37 environmental change remains incomplete<sup>1-5</sup>. Most reptile and some fish species undergo  
38 temperature-dependent sex determination (TSD), in which gonad differentiation is regulated  
39 by temperature at a critical period of embryogenesis<sup>6,7</sup>. Some species produce males at  
40 moderate temperatures and females at hot and cold extremes (e.g. the American alligator  
41 *Alligator mississippiensis*<sup>8</sup>, Type II TSD), but, more commonly, TSD species produce an  
42 increasing proportion of a specific sex across a range of incubation temperatures (Type Ia:  
43 Males at low temperatures, e.g. the painted turtle *Chrysemys picta*<sup>9</sup>; Type Ib: Females at low  
44 temperatures, e.g. the tuatara *Sphenodon punctatus*<sup>10</sup>). In all cases, both sexes are produced  
45 across a transitional range of temperatures, centered on a pivotal temperature at which both  
46 sexes develop in equal proportions. While the pivotal temperature varies among clutches  
47 within a population<sup>11</sup>, studies have generally focused on quantifying population-level means  
48 as important proxies to estimate sex ratios and predict population dynamics<sup>4,12,13</sup>. These  
49 population-level proxies suggest that rising global temperatures present the potential for  
50 extreme sex ratio biases in TSD species, with implications for population dynamics and  
51 extinction risk<sup>4</sup>.

52 The adaptive value of TSD is still debated, but fitness advantages under sex-specific thermal  
53 environments are predicted by the more favoured Charnov-Bull theory of differential  
54 fitness<sup>14,15</sup>. The postulates of this theory have been demonstrated in eggs of the Jacky dragon  
55 (*Amphibolurus muricatus*) that were experimentally treated with an aromatase inhibitor,  
56 constraining embryos to develop as males at female producing temperatures. These males  
57 showed lower lifetime reproductive success than controls<sup>3</sup>. While demonstrating the adaptive  
58 value of TSD, the use of an aromatase inhibitor to manipulate sex in this study also highlights  
59 the role of sex steroid hormones on the TSD mechanism<sup>16-18</sup>.

60 Exogenous application of estradiol (E<sub>2</sub>) to the incubating eggs of some species can feminise  
61 TSD embryos incubated at male-producing temperatures<sup>19-22</sup>. In addition, the application of

62 testosterone (T), the precursor androgen of E<sub>2</sub>, can also feminise embryos via the synthesis of  
63 E<sub>2</sub> from T by the aromatase enzyme<sup>20,23</sup>, and indeed the use of aromatase inhibitors can force  
64 male development<sup>24,25</sup>. Both temperature and exogenous treatment with E<sub>2</sub> activate the same  
65 molecular pathways, altering the transcription of the chromatin modifier gene *Kdm6b*, and  
66 conferring sensitivity to a sex-determining gene, *Dmrt1*<sup>2</sup>.

67 In model TSD species that exhibit Type 1a TSD, such as the slider (*Trachemys scripta*) and  
68 the painted turtle, maternal transfer of sex steroid hormones into eggs varies seasonally<sup>16,26</sup>.  
69 Elevated concentrations of maternal investment in yolk E<sub>2</sub> and greater E<sub>2</sub>:T ratios increase the  
70 likelihood of feminisation at a given temperature, effectively reducing the pivotal temperature  
71 of a clutch by providing substrate that will prime the activation of female-producing  
72 molecular pathways<sup>16,26</sup>. Should these patterns be found in non-model species, variation in  
73 maternal hormone transfer to eggs could be a universal mechanism to (i) change the threshold  
74 at which temperature affects an individual's sex development, (ii) modify the sex ratio of the  
75 clutch, and (iii) possibly buffer against the negative effects of rapid global temperature  
76 increase.

77 There is a particular need to understand the impacts of climate change on the demographics of  
78 threatened species. As a consequence of rising temperatures, extreme feminisation of sea  
79 turtle populations has been forecast by the end of the century<sup>4,27-29</sup>. Some studies suggest  
80 effects are already visible in adult populations<sup>28</sup>. There has been much study into how  
81 behavioural responses, such as modified phenology or nest site selection, may mitigate the  
82 effects of a warming environment<sup>30,31</sup>, but no overall trends preventing extirpation are visible.  
83 There has been, however, little consideration for physiological mechanisms that may increase  
84 variation in the pivotal temperature, and therefore on sex ratio. Understanding possible  
85 physiological mechanisms has been constrained in sea turtles in particular by the lack of non-  
86 lethal methods to sex neonates (but see<sup>32</sup>). This issue is especially important for endangered  
87 populations, where sacrificing individuals is not possible.

88 Here, we tested whether maternally-derived sex steroid hormones affect the sex-  
89 determination cascade and the resulting offspring sex ratios in an endangered sea turtle

90 population. Focusing on loggerhead turtles (*Caretta caretta*) nesting in the Cabo Verde  
91 archipelago, we standardised the thermal environment of clutches in an experimental field  
92 hatchery, exposed to natural conditions. Should temperature be the sole driver of sex  
93 determination, similar sex ratios among clutches would be expected under these standardised  
94 thermal conditions. Alternatively, any inter-clutch variation would arise from intrinsic  
95 characteristics of the eggs, such as maternally-derived hormones. To test these hypotheses,  
96 we quantified E<sub>2</sub> and T concentrations in the plasma of nesting females, their egg yolks and  
97 neonates. We developed a non-lethal sexing method using circulatory hormone profiles of  
98 neonates, and determined the clutches' sex ratios. Inter-clutch variation in sex ratio was then  
99 linked to yolk hormone concentrations. Finally, we illustrate how maternal hormone transfer  
100 impacts sex ratio in the face of IPCC climate change predictions, by re-parameterising a  
101 previously used mathematical model<sup>4</sup> to forecast the future population dynamics of this  
102 endangered nesting aggregation.

103

## 104 **Results**

105 This study focused on loggerhead turtles nesting on the island of Boavista in the Cape Verde  
106 archipelago. First, using enzyme-linked immunosorbent assays (ELISA – Enzo LifeSciences),  
107 we quantified concentrations of the sex steroid hormones E<sub>2</sub> and T in both the blood plasma  
108 of 26 nesting females and up to two of their eggs directly after oviposition. Clutch sizes were  
109 recorded at this time. High levels of individual variation were observed in adult plasma  
110 hormone levels (SI appendix, Table S1), with a mean T concentration of  $1148.48 \pm 148.63$   
111 (SE) pg/ml, a mean E<sub>2</sub> concentration of  $235.79 \pm 22.71$  (SE) pg/ml, and a mean E<sub>2</sub>:T ratio of  
112  $0.32 \pm 0.05$  (SE). Linear models (LM) showed positive correlations between E<sub>2</sub> and T in both  
113 the female plasma (SI Appendix, Fig. S1A,  $F_{1,16} = 4.608$ ,  $p = 0.048$ ) and their egg yolks (SI  
114 Appendix, Fig. S1B,  $F_{1,23} = 7.338$ ,  $p = 0.013$ ). In reptiles, maternally derived hormones are  
115 constant across all eggs of a given clutch<sup>33</sup>, which we confirmed with a subset of clutches  
116 where two egg yolks were analysed (Paired t-tests: T:  $df = 11$ ,  $t = 0.224$ ,  $p = 0.827$ ; E<sub>2</sub>:  $df =$   
117  $10$ ,  $t = -0.885$ ,  $p = 0.397$ ; E<sub>2</sub>:T:  $df = 9$ ,  $t = -1.173$ ,  $p = 0.271$ ).

118 There was a significant non-linear correlation between T concentrations in adult plasma and  
119 egg yolks (SI appendix, Fig. S2A: LM:  $F_{1,14} = 5.263$ ,  $p = 0.038$ ), where concentrations of yolk  
120 T were lowest in eggs originating from females with intermediate levels of plasma T, but did  
121 not correlate with clutch size (SI appendix, Fig. S2B:  $F_{1,14} = 0.032$ ,  $p = 0.862$ ). In contrast,  
122 adult female plasma  $E_2$  concentrations were not correlated with  $E_2$  in the egg yolk (SI  
123 appendix, Fig. S2C: LM:  $F_{1,21} = 0.908$ ,  $p = 0.351$ ), but as clutch size increased, yolk  $E_2$   
124 concentrations significantly decreased (SI Appendix, Fig. S2D: LM:  $F_{1,21} = 4.945$ ,  $p = 0.037$ ).  
125 The maternal  $E_2:T$  ratio showed a non-linear relationship with the  $E_2:T$  ratio in the egg yolk  
126 (SI Appendix, Fig. S2E:  $F_{1,14} = 6.493$ ,  $p = 0.023$ ), and was not correlated with clutch size (SI  
127 Appendix, Fig. S2F:  $F_{1,14} = 1.682$ ,  $p = 0.215$ ).

128 Immediately after oviposition, the clutches of these 26 females and two others ( $n = 28$ ) were  
129 relocated into an *in-situ* experimental hatchery that was protected from terrestrial predation,  
130 yet exposed to natural sand and weather conditions. We buried clutches at a depth of 55 cm to  
131 standardise the thermal incubation environment. We confirmed the standardised thermal  
132 environment using data loggers placed at the centre of the clutch (mean thermosensitive  
133 period temperature =  $30.02 \pm 0.05$  (SE) °C, SI Appendix, Fig. S3). The small amount of  
134 temperature variation observed was explained by differences in clutch size ( $F_{1,26} = 4.418$ ,  $p =$   
135  $0.045$ ), resulting from increased metabolic heat produced from more developing embryos in  
136 larger clutches<sup>34</sup>. Assuming the pivotal temperature of this population to be 29 °C, as has  
137 previously been used for this population<sup>4</sup>, this incubation temperature would produce  $12.89 \pm$   
138  $0.01$  (SE) % male offspring if temperature was the sole determinant of sex ratio (Fig. 1A).

139 Incubation duration, the time between oviposition and neonate emergence, is also often used  
140 as a proxy to predict offspring sex ratios (e.g.  $r^2 = 0.73$  in nests in Brazil<sup>35</sup>) and was recorded  
141 for each clutch<sup>35</sup>. Using the established logistic relationship between incubation duration and  
142 sex ratio observed in loggerhead turtles from Kyparissia, Greece (Fig. 1B, the closest location  
143 where the relationship between incubation duration and offspring sex ratio has been  
144 quantified for loggerhead turtles), the predicted sex ratio of our study clutches would be 47.5

145  $\pm 6$  (SE) % males<sup>36</sup>. This suggests that levels of sex ratio variation are far greater than those  
146 we would expect from temperature alone.

147 While the incubation duration represents a reasonable proxy for estimating the sex ratio of sea  
148 turtle offspring, currently the only accurate method to resolve individual sex requires  
149 sacrificing neonates and histological examination - a limiting factor for endangered  
150 populations<sup>35,37</sup>. However, we developed a new method to ascertain individual sex without the  
151 need to sacrifice animals. After taking 100 – 150  $\mu$ l of blood from 365 offspring from 28  
152 clutches after emergence (mean offspring per clutch =  $13 \pm 4$  (SE)), we measured plasma  
153 hormone concentrations using ELISA. Hatchling hormone levels varied among individuals  
154 (SI Appendix, Table S1) and among clutches, with the average E<sub>2</sub>:T ratio of clutches ranging  
155 from  $1.06 \pm 0.13$  (SE) to  $3.56 \pm 0.68$  (SE). We used affinity propagation clustering (APC) on  
156 hatchling E<sub>2</sub>:T ratios guided by incubation duration to identify clusters of individuals with a  
157 similar hormonal phenotype. APC iteratively considers the similarity of a data point to its  
158 neighbours. Importantly, it does not require the number of possible clusters to be defined *a*  
159 *priori*, as is necessary for other clustering approaches such as k-means<sup>38</sup>. We identified three  
160 APC clusters (Fig. 2A). Two of these originate from clutches with short incubation durations,  
161 the classic trait of female neonates, and were distinguished by differences in their mean E<sub>2</sub>:T  
162 ratio (SI Appendix, Fig. S4, Cluster 1: mean =  $4.45 \pm 0.26$  (SE), Cluster 2: mean =  $1.72 \pm$   
163  $0.05$  (SE), t-test: df = 44.08, t = 10.273, p < 0.001). The third group is formed by individuals  
164 from clutches with longer incubation durations (t-test: df = 299.3, t = -32.933, p < 0.001) and  
165 a low E<sub>2</sub>:T ratio (SI Appendix, Fig. S4, mean =  $1.52 \pm 0.06$  (SE)), the characteristics of male  
166 sea turtle neonates.

167 Several positive theoretical controls were used to confirm this method since neonate  
168 sacrificing is not possible. First, linear mixed effect models (LMM) using clutch ID as a  
169 random factor revealed significant differences in hormone levels between the two sexes, that  
170 were directly comparable to previous studies in which individuals' sex was confirmed  
171 through histology<sup>39,40</sup>. As expected, T levels were higher in males (Fig. 2Bi, LMM: F<sub>1,60</sub> =  
172 10.673, p = 0.002, mean =  $63.63 \pm 2.89$  (SE) pg/ml) than in females (mean =  $52.54 \pm 2.34$

173 (SE) pg/ml), and conversely E<sub>2</sub> levels were higher in females (Fig. 2Bii, LMM:  $F_{1,57} = 7.521$ ,  
174  $p = 0.008$ , mean =  $92.94 \pm 3.06$  (SE) pg/ml) than in males (mean =  $81.66 \pm 3.16$  (SE) pg/ml),  
175 as was the overall E<sub>2</sub>:T ratio (Fig. 2Biii, LMM:  $F_{1,48} = 28.652$ ,  $p < 0.001$ , females: mean =  
176  $2.22 \pm 0.09$  (SE); males: mean =  $1.52 \pm 0.06$  (SE)). LMMs did not detect any difference in  
177 weight ( $F_{1,348} = 0.024$ ,  $p = 0.878$ ) or size ( $F_{1,218} = 0.766$ ,  $p = 0.382$ ) between the sexes, as  
178 would be expected under these conditions by the Charnov-Bull theory<sup>14</sup>. Second, by  
179 combining individual offspring sex into an estimate of clutch sex ratio, and comparing this to  
180 the incubation duration, we found the specific logistic regression curve that characterises  
181 incubation durations in Type Ia TSD species (Fig. 2C). The pivotal duration was fitted to a  
182 value of 57.25 days (95% CIs: 57.09, 57.43), with a transitional range of incubation durations  
183 of 2.15 days (95% CIs: 1.52, 2.77). Importantly, if individual sex were incorrectly assigned,  
184 this distinctive logistic regression curve of TSD species would not be seen. With this method,  
185 we determined that clutch sex ratios were on average  $40.49 \pm 8.98$  (SE) % male. This  
186 suggests 26.1% more males and far more variation in clutch sex ratio than would be expected  
187 based on incubation temperatures alone. Our sex ratio estimate is slightly below (7.1%) that  
188 estimated from parameters based on incubation durations in Kyparissia, suggesting  
189 population differences in development rate exist, likely as a result of different average pivotal  
190 temperatures among rookeries.

191 After establishing that the inter-clutch variation in sex ratio (and also in incubation duration,  
192 see SI Appendix Supplementary Analysis) was too great to be produced by temperature alone,  
193 we tested whether metabolic heat and/or maternal hormone transfer in the yolk predicted  
194 incubation duration and the estimated sex ratio. Yolk T correlated negatively with both  
195 incubation duration (LM,  $F_{1,22} = 10.624$ ,  $p = 0.003$ ) and the proportion of males produced  
196 within a clutch (Fig. 3A, Binomial generalised linear mixed effect models (GLMM),  $\chi^2 =$   
197  $4.371$ ,  $df = 1$ ,  $p = 0.037$ ), but metabolic heat had no detectable effect (incubation duration  
198 model:  $F_{1,22} = 2.436$ ,  $p = 0.133$ , sex ratio model:  $\chi^2 = 2.111$ ,  $df = 1$ ,  $p = 0.146$ ). There was no  
199 relationship between yolk E<sub>2</sub> and incubation duration or clutch sex ratio (Fig. 3B, incubation  
200 duration:  $F_{1,23} = 3.169$ ,  $p = 0.088$ , sex ratio:  $\chi^2 = 0.183$ ,  $df = 1$ ,  $p = 0.669$ ), yet the yolk E<sub>2</sub>:T



201 ratio showed a non-linear relationship with both incubation duration (Fig. 3C,  $F_{1,21} = 12.882$ ,  
202  $p = 0.002$ ) and sex ratio independently of temperature ( $x^2 = 39.319$ ,  $df = 2$ ,  $p < 0.001$ ). A  
203 maximum incubation duration of 57.2 days was observed at an equal hormone ratio ( $E_2:T$  of  
204 1.05,  $y = -7.8x^2 + 16.3x + 48.7$ ) with the highest levels of male offspring developing at this  
205 point. Because of the presence of a possible outlier with a high yolk  $E_2:T$  ratio, we re-  
206 analysed the data without this point. The same patterns remained with significant non-linear  
207 relationships between yolk  $E_2:T$  ratios and incubation duration ( $F_{1,20} = 6.292$ ,  $p = 0.021$ ) as  
208 well as between yolk  $E_2:T$  ratios and hatchling sex ratios ( $x^2 = 7.584$ ,  $df = 2$ ,  $p = 0.022$ ).  
209 Male offspring production was highest when maternal investment of  $E_2$  and T to the yolk was  
210 equal. Asking whether the production of either sex is more costly in terms of total hormone  
211 investment, we compared the total hormone concentration ( $E_2 + T$ ) with the overall  $E_2:T$  ratio.  
212 This relationship was again non-linear, with total hormone investment being highest when the  
213  $E_2:T$  ratio was unequal (SI Appendix, Fig. S5A, LM:  $F_{2,22} = 4.951$ ,  $p = 0.017$ ), suggesting that  
214 producing females requires more maternal investment than males. The total hormone  
215 investment also showed a non-linear relationship with clutch size (SI Appendix, Fig S5B,  
216  $\log(E_2 + T)$ :  $F_{2,22} = 4.306$ ,  $p = 0.026$ ), with an initial increase in investment across clutch sizes  
217 between 65 and 75 eggs, after which investment declined with increasing clutch size.  
218 Finally, to illustrate how maternal hormone transfer could impact population dynamics, we  
219 re-parameterised a previously published mathematical projection of neonate sex ratios for the  
220 Cape Verde population<sup>4</sup>, which assumed a fixed pivotal temperature of 29 °C. We made the  
221 simple assumption that the effect of maternally derived hormones on sex ratio is constant  
222 across a thermal gradient and applied the 26.1% observed difference in male offspring  
223 production for the coming century (Fig. 4). With a mechanism of this possible strength, the  
224 population is unlikely to reach the levels of extreme feminisation previously forecasted –  
225 instead of female production reaching over 97% in 2100, it is likely to instead reach  
226 approximately 71%. As it remains to be determined how maternal hormone transfer interacts  
227 with different incubation temperatures, this model only illustrates the potential importance of  
228 trans-generational hormone transfer for population dynamics.

229

230 **Discussion**

231 It is widely speculated that global warming can drive species with temperature-dependent sex  
232 determination to extinction because of the over-production of one sex. But, given the many  
233 considerable historical shifts in climate experienced by TSD species, they are likely to have  
234 evolved behavioural and/or physiological mechanisms to avoid unviable biases in offspring  
235 sex ratio<sup>5</sup>. By experimentally standardising the thermal environment of loggerhead sea turtle  
236 nests *in-situ*, we investigated whether maternally derived hormones correlate with offspring  
237 sex independently of temperature. First, we developed a non-lethal method to determine the  
238 sex of neonates upon their nest emergence, using affinity propagation clustering based on  
239 individual circulatory sex steroid hormones and their incubation duration. With this method,  
240 we found a non-linear relationship between the clutch sex ratios and the ratios of maternally  
241 derived E<sub>2</sub>:T within the egg yolks under standardised thermal conditions. Low concentrations  
242 of equal investment in both hormones within the yolk maximise the production of male  
243 offspring, while increasing the concentration of either E<sub>2</sub> or T, along with overall hormone  
244 investment, feminises the clutches. Re-parameterising an existing model that predicts sex  
245 ratio biases in response to climate change demonstrated that this trans-generational  
246 mechanism could prevent the predicted extreme feminisation of loggerhead turtles in Cabo  
247 Verde.

248 To date, an inability to determine neonate sex non-lethally has constrained the study of TSD  
249 mechanisms in endangered sea turtles (but see<sup>32</sup>). A clustering approach that identifies  
250 individuals with similar phenotypes (here hormone profiles) that match control traits of male  
251 and female offspring (incubation duration) overcame this problem. Using E<sub>2</sub>:T thresholds to  
252 define neonate sex has been verified with histological analysis in loggerhead<sup>40</sup> and green<sup>39</sup>  
253 turtles, but as E<sub>2</sub>:T levels vary considerably among clutches, it is difficult to delineate a  
254 population level threshold *a priori*. Using an APC method guided by incubation duration to  
255 group hormone profiles, a common proxy for sex ratio, we avoid the need to define thresholds  
256 and, importantly, the need to sacrifice individuals<sup>35</sup>. Because ethically we cannot validate this

257 method further, we rely on strong indirect evidence, such as (i) the identified significant  
258 difference in circulating  $E_2:T$  ratios of male and female offspring (ii) the pivotal duration both  
259 match those reported in other studies<sup>36,39-42</sup>, and (iii) the relationship between sex ratio and  
260 incubation duration fits the known logistic regression curve observed in Type Ia TSD species.  
261 We anticipate that this non-lethal approach will prove an invaluable tool for both research on  
262 TSD in sea turtle species and also for wider conservation.

263 Despite the standardised thermal environment of clutches within this experiment, high levels  
264 of variation in incubation duration and sex ratio were observed among nests, both of which  
265 correlated with maternally derived hormones within the egg yolk. The relationship between  
266 the yolk  $E_2:T$  ratio and clutch sex ratio was best described by a quadratic curve, centred on an  
267 equal concentration of both hormones and ranging from 0.37 to 1.73. When maternal  
268 investment of  $E_2$  and T was equal, incubation durations were long, and males were produced.  
269 If hormone investment was biased in either direction, sex ratios became increasingly  
270 feminised. The effects of elevated levels of both  $E_2$  and T on sex ratios in this study are  
271 consistent with experimental manipulation of these hormones in other species<sup>2,20,22</sup>. In  
272 addition, the non-linear relationship explains studies where exogenous application of  $E_2$  has  
273 unexpectedly produced male hatchlings (e.g.<sup>43,44</sup>). In such cases,  $E_2$  application, combined  
274 with existing maternal contributions, may have resulted in shifting the  $E_2:T$  ratio within the  
275 eggs closer to one, forcing male development. Interestingly, in all other reptiles for which  
276 data are available, the  $E_2:T$  ratios that are transferred to the yolk consistently remain below or  
277 above the ratio of one<sup>45</sup>. Thus, our study shows how maternal transfer of both hormones can  
278 influence the feminisation process of reptiles under natural conditions.

279 Total hormone concentrations within the yolk were lowest at an equal, male producing,  $E_2:T$   
280 ratio. If this ratio departed from 1:1 in either direction, total concentrations of yolk hormones  
281 increased. As  $E_2$  and T positively correlate within the egg, if investment in either hormone is  
282 elevated, there is an associated increase in the other. The outcome is that greater investment is  
283 required to skew  $E_2:T$  ratios in a manner that favours the production of female offspring. This  
284 maternal investment provides initial hormonal substrate with which to prime the reactions

285 required to activate molecular pathways that result in female gonad development. When  $E_2:T$   
286 ratios are skewed, and total hormone concentrations are high, feminisation is easily achieved  
287 through either the presence of  $E_2$  directly, or by the synthesis of  $E_2$  from its precursor, T, by  
288 the aromatase enzyme. When  $E_2$  and T are in equilibrium, low concentrations of  $E_2$  are not  
289 sufficient to feminise the clutch. However, product-feedback inhibition of aromatase  
290 receptors likely prevents further  $E_2$  being synthesised from T, and consequently male  
291 offspring are produced.

292 There is no doubt that temperature is the primary determinant of sex in TSD species, but  
293 studies have repeatedly recorded variation in sex ratios among clutches exposed to similar  
294 temperature regimes<sup>32,46</sup>. Maternally-derived  $E_2$  and T can affect the same developmental  
295 pathways as temperature, and explain some of this variation by priming reactions required to  
296 initiate female producing pathways<sup>2,22</sup>. Interestingly, the effects of these hormones on sex  
297 determination vary by experiment and species, likely as the results of adaptation to local  
298 nesting conditions (e.g.<sup>43,44</sup>). However, here we show that in sea turtles, a clutch specific  
299 threshold exist for feminisation that is the product of an interaction between temperature and  
300 maternal hormone transfer. A shift towards an equal  $E_2:T$  ratio and lower maternal investment  
301 will increase the pivotal temperature away from the feminisation threshold, and consequently  
302 warmer temperatures would be required to feminise a clutch. This aligns with the sex ratios  
303 observed within this study, which contained 26.1% more males than expected from a pivotal  
304 temperature of 29 °C. However, this mechanism will be constrained by physiological limits of  
305 maternal hormone investment. Our findings provide mechanistic explanations for the high  
306 inter-clutch variation that has been observed in TSD systems (eg<sup>11,46</sup>), and also clarify  
307 occasions where female offspring have been produced at assumed male producing  
308 temperatures, or vice versa<sup>32</sup>.

309 Two maternal traits show a relationship with levels of hormone transfer to the clutch. Firstly,  
310 T concentrations within the yolk correlated non-linearly with those in maternal plasma.  
311 Disentangling the cause of such a relationship is complex as it is likely to result from multiple  
312 physiological cascades<sup>47</sup>. As vitellogenesis and follicular development in sea turtles occurs

313 prior to migration, it is also likely that T concentrations in maternal plasma varies when yolks  
314 is formed<sup>48</sup>. However, this relationship does allow us to link T investment to maternal state.  
315 Should maternal T vary in response to environmental cues, as in the spined toad (*Bufo*  
316 *spinosus*), it may allow nesting females to plastically match the individual development  
317 threshold of feminisation to the ambient temperature, and maintain more constant sex ratios  
318 across a nesting season<sup>49</sup>. Similar differences in the maternally-transferred E<sub>2</sub>:T ratio in the  
319 egg yolk of a population of painted turtles resulted in a seasonal shift of the pivotal  
320 temperature, albeit in a direction that accelerated female production as temperatures  
321 increased<sup>16</sup>. Secondly, total E<sub>2</sub> investment within eggs decreased as clutch size increased, and  
322 total hormone concentrations were low in large clutches. Thus, in large clutches with more  
323 metabolic heat production, the developmental threshold of feminisation is increased –  
324 minimising sex bias. We infer from these results that there are two distinct mechanisms that  
325 can affect the ratio of E<sub>2</sub>:T within the yolk, which explains how elevated investment in either  
326 hormone can lead to feminisation. There is considerable variation in circulating T and E<sub>2</sub>  
327 levels between sea turtle populations and species (SI Appendix, Table S1), which may  
328 suggest an element of local adaptation in response to environmental conditions, and a  
329 heritable component of baseline physiological levels<sup>50</sup>.

330 TSD species will require behavioural and/or physiological responses to maintain viable sex  
331 ratios in the face of future climate change. Here, we highlight a previously under-considered  
332 physiological mechanism for individual variation in the TSD process within sea turtle species.  
333 There is a need for management plans that use temperature-based models to predict future sex  
334 ratios to account for maternal hormonal influence, as this will have considerable implications  
335 for population dynamics.

336

### 337 **Methods**

#### 338 *Sample Collection*

339 We studied nesting loggerhead sea turtles on the island of Boavista, part of the Cabo Verde  
340 archipelago in the eastern Atlantic. The sampling site (15°58'18.6"N, 22°48'06.2"W) is a 400

341 m stretch of coastline on the southern tip of this island. Twenty-eight nesting females were  
342 sampled between 17 July and 1 August 2017. Immediately after oviposition, females were  
343 individually marked with PIT (AVID) and metal (Inconel) tags<sup>51</sup>. Blood samples of 1-4 ml in  
344 volume were collected from the dorsal cervical sinus of 26 females using a 40 mm, 21-gauge  
345 needle and 5 ml syringe, and stored within lithium heparin containers. Finally, curved  
346 carapace length (CCL) and width (CCW) were measured ( $\pm 0.1$  cm).

347 The clutches of these turtles (containing  $83 \pm 3$  (SE) eggs) were relocated to an experimental  
348 hatchery protected from predation, situated on the nesting beach. At this point, up to two eggs  
349 from the 28 clutches were removed from each clutch for yolk hormone analysis, and the rest  
350 of the clutch was buried at a depth of 55 cm. By using a standard depth, temperature was  
351 controlled for, while maintaining an otherwise natural environment. A TinyTag™  
352 temperature logger was placed at the centre of each clutch, programmed to take a reading  
353 every 15 minutes throughout the incubation period (accuracy  $\pm 0.2$  °C). As anticipated, the  
354 uniform depth standardised the incubation temperature of the nests to  $30.05 \pm 0.05$  (SE) °C  
355 during the middle third of incubation, the period where embryo sex is established. This  
356 variation in temperature is extremely conserved, and is representative of the thermal variation  
357 produced within treatments under controlled laboratory incubations<sup>52,53</sup>.

358 Upon emergence, twenty hatchlings were randomly selected for blood sampling (100 – 150  
359  $\mu$ l) from the dorsal cervical sinus, using a 26-gauge needle and 1 ml syringe<sup>54</sup>. Samples were  
360 stored within lithium heparin coated tubes. Notch-to-notch straight carapace length (SCL)  
361 and, width (SCW) were measured using digital callipers ( $\pm 0.01$  mm), and weight was  
362 measured with a digital scale ( $\pm 0.1$  g)).

363 The blood samples of both the adults and offspring were refrigerated for up to 48 h before  
364 being centrifuged to extract plasma. Egg yolks were separated from the albumen, and all  
365 samples were stored at -20 °C until extraction.

366

367 *Hormone extraction*

368 Commercially available Enzyme-Linked Immunosorbent Assay (ELISA) kits for both E<sub>2</sub>  
369 (Catalogue # ADI-900-174, ENZO Life Sciences) and T (Catalogue # ADI-900-065) were  
370 used to measure steroid levels in all samples. Details for hormone extraction protocols are  
371 given in SI methods. Not all blood samples had sufficient volume for hormone extraction.  
372 Consequently, we extracted E<sub>2</sub> from 24 adults and 388 hatchling blood samples, and T from  
373 19 adult and 367 hatchling blood samples. This provided us with E<sub>2</sub>:T ratios for 18 adult  
374 females, and 365 hatchlings. E<sub>2</sub> and T were successfully extracted from the yolks of 26 out of  
375 the 28 sampled clutches. One yolk T measurement was removed as an outlier, being more  
376 than three standard deviations from the mean (mean: 741.26 ± 502.29 (SD) pg/g, outlier:  
377 2882.05 pg/g).

378

### 379 *Statistical Analyses*

380 All analyses were conducted with R 3.3.3, using the R packages *lme4* and *lmerTest* for fitting  
381 linear mixed models (LMMs) and generalized linear mixed models (GLMMs). A paired t-test  
382 was used to compare intra-clutch E<sub>2</sub> and T levels between two eggs in a subset of clutches (n  
383 = 13), to test whether that there was variation in hormone investment between eggs in a  
384 clutch. As there was no difference between eggs from the same clutch, for subsequent  
385 analyses the average hormone was used where possible, while a single egg was used for the  
386 remainder of the clutches. Correlations between E<sub>2</sub> and T in female plasma and yolks, the  
387 effect of clutch size on temperature, and the effects of metabolic heat and maternally derived  
388 hormones on incubation duration were tested using general linear models (LM). A non-linear  
389 relationship between the E<sub>2</sub>:T ratio on incubation duration was fitted using a quadratic curve.  
390 Similarly, when considering the relationship between E<sub>2</sub>:T and total hormone investment, we  
391 also fit a quadratic model. LMs were also used to estimate the correlation of clutch size and  
392 plasma hormone concentrations with yolk hormone concentrations.

393 We used Algorithm Propagation Clustering (APC) to identify individual sex, using the R  
394 package *apcluster*<sup>38</sup>. Cluster assignment was made based on the plasma E<sub>2</sub>:T ratio of  
395 hatchlings, guided by their incubation duration. Determining neonate sea turtle sex using the

396 E<sub>2</sub>:T ratio has previously been extremely accurate (96% and 96.7% respectively) for  
397 artificially incubated eggs of loggerhead and green sea turtles<sup>39,40</sup> that were ultimately  
398 sacrificed for verification. Since variation likely exists among rookeries, those thresholds  
399 however cannot be blindly applied to new populations. T-tests were used to compare hormone  
400 levels of putative male and female hatchlings. A response curve of these estimated sex ratios  
401 to incubation duration was produced using the logistic equation function of the R package  
402 *embryogrowth* to further verify the accuracy of our non-lethal sexing method.

403 After identifying the sex of individuals, LMMs were used to compare individual size and  
404 weight between the sexes and the APC clusters. Finally, we used binomial GLMMs to  
405 determine whether individual hatchling sex was predicted by maternal hormone investment or  
406 temperature. For all LMM and GLMM analyses, clutch was included as a random factor to  
407 account for individual variation. Model selection was based on AIC criteria, using a  
408 likelihood ratio tests to select for the best models. P-values of the selected models were  
409 obtained by with the *car* R package, and models were verified for over-dispersion.

410 Thermal estimates of sex ratio were calculated using the equation first presented by Girondot  
411 in 1999 with the R package *embryogrowth*, under an assumed pivotal temperature of 29 °C<sup>55</sup>.  
412 Estimates of sex ratio based on incubation duration were made based on data from a study on  
413 a neighbouring loggerhead sea turtle population that nests in Kyparissia, Greece, and was  
414 confirmed with histology<sup>36</sup>. To generate an illustrative model that compared the results of our  
415 study with future predictions based on temperature alone, we extracted data from a previously  
416 published study predicting sex ratios until 2100 based on a fixed pivotal temperature of 29 °C  
417 alone. We then compared our observed mean clutch sex ratio to that expected from a pivotal  
418 temperature of 29 °C, and added the difference, along with 95% confidence intervals, to the  
419 original prediction.

420

#### 421 **Acknowledgements**

422 This work was carried out as part of The Turtle Project, a citizen science project dedicated to  
423 sea turtle research and conservation. We thank volunteers and staff from Turtle Foundation in



424 particular for facilitating this research. Particular thanks go to S. Cameron for considerable  
425 help during data collection. E.L. was supported by a studentship from the London Natural  
426 Environment Research Council Doctoral Training Partnership (grant NE/L002485/1). This  
427 study was supported by a National Geographic grant (NGS-59158R-19), Natural  
428 Environment Research Council (NE/V001469/1) as well as Queen Mary University of  
429 London Funds allocated to CE. We also acknowledge the support from ‘The Future Ocean’  
430 Excellence Initiative by the Deutsche Forschungsgemeinschaft (DFG) that granted a  
431 ‘Capacity building grant’ to C.E. The authors would like to thank the Eizaguirre lab as well as  
432 Dr. José María Martín-Durán and Dr. Gail Schoefield for their feedback on previous versions  
433 of the manuscript.

434

#### 435 **Author Contributions**

436 E.L. and C.E. designed the experiment. T.R. facilitated the fieldwork. E.L. and C.E.  
437 conducted the fieldwork. E.L. analysed the data and drafted the initial manuscript, with  
438 feedback from C.E.. All authors approved the manuscript.

439

#### 440 **References**

- 441 1. Charnier, M. Action of temperature on the sex ratio in the Agama agama (Agamidae,  
442 Lacertilia) embryo. *C R Seances Soc Biol Fil.* **160**, 620–622 (1966).
- 443 2. Ge, C. *et al.* The histone demethylase KDM6B regulates temperature-dependent sex  
444 determination in a turtle species. *Science* **360**, 645–648 (2018).
- 445 3. Warner, D. A. & Shine, R. The adaptive significance of temperature-dependent sex  
446 determination in a reptile. *Nature* **451**, 2006–2009 (2008).
- 447 4. Laloë, J.-O. *et al.* Climate change induced extinction does not seem imminent at an  
448 important sea turtle rookery. *Nat. Clim. Chang.* **4**, 1–7 (2014).
- 449 5. Mitchell, N. J. & Janzen, F. J. Temperature-dependent sex determination and

- 450 contemporary climate change. *Sex. Dev.* **4**, 129–140 (2010).
- 451 6. Bull, J. J. Sex determination in reptiles. *Q. Rev. Biol.* **55**, 3–21 (1980).
- 452 7. Deeming, D. C. *et al.* Environmental Regulation of Sex Determination in Reptiles.  
453 *Philos. Trans. R. Soc. B Biol. Sci.* **322**, 19–39 (1988).
- 454 8. Ferguson, M. W. J. & Joanen, T. Temperature-dependent sex determination in  
455 Alligator mississippiensis. *J. Zool.* **200**, 143–177 (1983).
- 456 9. Bull, J. J. & Vogt, R. C. Temperature-Dependent Sex Determination in Turtles.  
457 *Science* **206**, 1186–1188 (1979).
- 458 10. Cree, A., Thompson, M. B. & Daugherty, C. H. Tuatara sex determination. *Nature*  
459 **375**, 543 (1995).
- 460 11. Dodd, K. L., Murdock, C. & Wibbels, T. Interclutch variation in sex ratios produced at  
461 pivotal temperature in the red-eared slider, a turtle with temperature-dependent sex  
462 determination. *J. Herpetol.* **40**, 544–549 (2006).
- 463 12. Godley, B. J., Broderick, A. C., Glen, F. & Hays, G. C. Temperature-dependent sex  
464 determination of Ascension Island green turtles. *Mar. Ecol. Prog. Ser.* **226**, 115–124  
465 (2002).
- 466 13. Lolavar, A. & Wyneken, J. Experimental assessment of the effects of moisture on  
467 loggerhead sea turtle hatchling sex ratios. *Zoology* **123**, 64–70 (2017).
- 468 14. Charnov, E. . & Bull, J. . When is sex environmentally determined? *Nature* **266**, 828–  
469 830 (1977).
- 470 15. Shine, R. Why is sex determined by nest temperature in many reptiles? *Trends Ecol.*  
471 *Evol.* **14**, 186–189 (1999).

- 472 16. Bowden, R. M., Ewert, M. A. & Nelson, C. E. Environmental sex determination in a  
473 reptile varies seasonally and with yolk hormones. *Proc. R. Soc. B Biol. Sci.* **267**, 1745–  
474 1749 (2000).
- 475 17. Elf, P. K. Yolk steroid hormones and sex determination in reptiles with TSD. *Gen.*  
476 *Comp. Endocrinol.* **132**, 349–355 (2003).
- 477 18. Bowden, R. M. & Paitz, R. T. Temperature fluctuations and maternal estrogens as  
478 critical factors for understanding temperature-dependent sex determination in nature *J.*  
479 *Exp. Biol. part A Ecol. Integr. Physiol.* 1–8 (2018).
- 480 19. Crews, D., Bull, J. J. & Wibbels, T. Estrogen and sex reversal in turtles: A dose-  
481 dependent phenomenon. *Gen. Comp. Endocrinol.* **81**, 357–364 (1991).
- 482 20. Crews, D., Wibbels, T. & Gutzke, W. H. N. Action of sex steroid hormones on  
483 temperature-induced sex determination in the snapping turtle (*Chelydra serpentina*).  
484 *Gen. Comp. Endocrinol.* **76**, 159–166 (1989).
- 485 21. Merchant-Larios, H., Ruiz-Ramirez, S., Moreno-Mendoza, N. & Marmolejo-Valencia,  
486 A. Correlation among thermosensitive period, estradiol response, and gonad  
487 differentiation in the sea turtle *Lepidochelys olivacea*. *Gen. Comp. Endocrinol.* **107**,  
488 373–385 (1997).
- 489 22. Wibbels, T., Bull, J. J. & Crews, D. Synergism between temperature and estradiol: a  
490 common pathway in turtle sex determination? *J. Exp. Zool.* **260**, 130–134 (1991).
- 491 23. Wibbels, T. & Crews, D. Specificity of steroid hormone-induced sex determination in  
492 a turtle. *J. Endocrinol.* **133**, 121–129 (1992).
- 493 24. Rhen, T. & Lang, J. W. Phenotypic plasticity for growth in the common snapping  
494 turtle: effects of incubation temperature, clutch , and their interaction. *Am. Nat.* **146**,  
495 726–747 (1995).

- 496 25. Wibbels, T. & Crews, D. Putative aromatase inhibitor induces male sex determination  
497 in a female unisexual lizard and in a turtle with temperature-dependent sex  
498 determination. *J. Endocrinol.* **141**, 295–299 (1994).
- 499 26. Carter, A. W., Bowden, R. M. & Paitz, R. T. Seasonal shifts in sex ratios are mediated  
500 by maternal effects and fluctuating incubation temperatures. *Funct. Ecol.* **31**, 876–884  
501 (2017).
- 502 27. Hawkes, L., Broderick, A., Godfrey, M. & Godley, B. Climate change and marine  
503 turtles. *Endanger. Species Res.* **7**, 137–154 (2009).
- 504 28. Jensen, M. P. *et al.* Environmental warming and feminization of one of the largest sea  
505 turtle populations in the world. *Curr. Biol.* **28**, 154–159 (2017).
- 506 29. Tanner, C., Marco, A., Martins, S., Abella-Perez, E. & Hawkes, L. Highly feminised  
507 sex ratio estimations for the world’s third-largest nesting aggregation of the  
508 loggerhead sea turtle. *Mar. Ecol. Prog. Ser.* **621**, 209–219 (2019).
- 509 30. Mazaris, A. D., Kallimanis, A. S., Pantis, J. D. & Hays, G. C. Phenological response  
510 of sea turtles to environmental variation across a species’ northern range. *Proc. Biol.*  
511 *Sci.* **280**, 20122397 (2013).
- 512 31. Reneker, J. L. & Kamel, S. J. The maternal legacy: female identity predicts offspring  
513 sex ratio in the Loggerhead Sea Turtle. *Sci. Rep.* **6**, 29237 (2016).
- 514 32. Tezak, B., Sifuentes-Romero, I., Milton, S. & Wyneken, J. Identifying sex of neonate  
515 turtles with temperature-dependent sex determination via small blood samples. *Sci.*  
516 *Rep.* **10**, 5012 (2020).
- 517 33. Janzen, J., Wilson, M. E., Tucker, J. K. & Ford, S. P. Endogenous yolk steroid  
518 hormones in turtles with different sex-determining mechanisms. *Gen. Comp.*  
519 *Endocrinol.* **111**, 306–317 (1998).

- 520 34. DeGregorio, B. A. & Williard, A. S. Incubation temperatures and metabolic heating of  
521 relocated and in situ loggerhead sea turtle (*Caretta caretta*) nests at a northern  
522 rookery. *Chelonian Conserv. Biol.* **10**, 54–61 (2011).
- 523 35. Mrosovsky, N., Baptistotte, C. & Godfrey, M. H. Validation of incubation duration as  
524 an index of the sex ratio of hatchling sea turtles. *Can. J. Zool.* **77**, 831–835 (1999).
- 525 36. Mrosovsky, N., Kamel, S., Rees, A. F. & Margaritoulis, D. Pivotal temperature for  
526 loggerhead turtles (*Caretta caretta*) from Kyparissia Bay, Greece. *Can. J. Zool.* **80**,  
527 2118–2124 (2002).
- 528 37. Ceriani, S. A. & Wyneken, J. Comparative morphology and sex identification of the  
529 reproductive system in formalin-preserved sea turtle specimens. *Zoology* **111**, 179–  
530 187 (2008).
- 531 38. Frey, B. J. & Dueck, D. Clustering by passing messages between data points. *Science*.  
532 **315**, 972–976 (2007).
- 533 39. Xia, Z.-R., Li, P.-P., Gu, H.-X., Fong, J. J. & Zhao, E.-M. Evaluating noninvasive  
534 methods of sex identification in green sea turtle (*Chelonia mydas*) hatchlings.  
535 *Chelonian Conserv. Biol.* **10**, 117–123 (2011).
- 536 40. Gross, T. S., Crain, D. a, Bjorndal, K. a, Bolten, a B. & Carthy, R. R. Identification of  
537 sex in hatchling loggerhead turtles (*Caretta caretta*) by analysis of steroid  
538 concentrations in chorioallantoic/amniotic fluid. *General and comparative*  
539 *endocrinology* **99**, 204–210 (1995).
- 540 41. Kaska, Y. *et al.* Sex ratio estimations of loggerhead sea turtle hatchlings by  
541 histological examination and nest temperatures at Fethiye beach, Turkey.  
542 *Naturwissenschaften* **93**, 338–343 (2006).
- 543 42. Marcovaldi, M., Godfrey, M. H. & Mrosovsky, N. Estimating sex ratios of loggerhead

- 544 turtles in Brazil from pivotal incubation durations. *Can. J. Zool.* **75**, 755–770 (1997).
- 545 43. Warner, D. A., Addis, E., Du, W. guo, Wibbels, T. & Janzen, F. J. Exogenous  
546 application of estradiol to eggs unexpectedly induces male development in two turtle  
547 species with temperature-dependent sex determination. *Gen. Comp. Endocrinol.* **206**,  
548 16–23 (2014).
- 549 44. Warner, D. A., Mitchell, T. S., Bodensteiner, B. L. & Janzen, F. J. Sex and incubation  
550 temperature independently affect embryonic development and offspring size in a turtle  
551 with temperature-dependent sex determination. *Physiol. Biochem. Zool.* **93**, 62–74  
552 (2020).
- 553 45. Radder, R. S. Maternally derived egg yolk steroid hormones and sex determination:  
554 review of a paradox in reptiles. *J. Biosci.* **32**, 1213–1220 (2007).
- 555 46. LeBlanc, A. M. *et al.* Nest temperatures and hatchling sex ratios from loggerhead  
556 turtle nests incubated under natural field conditions in Georgia, United States.  
557 *Chelonian Conserv. Biol.* **11**, 108–116 (2012).
- 558 47. Groothuis, T. G. G. & Schwabl, H. Hormone-mediated maternal effects in birds:  
559 mechanisms matter but what do we know of them? *Philos. Trans. R. Soc. B Biol. Sci.*  
560 **363**, 1647–1661 (2008).
- 561 48. Hamann, M., Limpus, C. J. & Whittier, J. M. Patterns of lipid storage and mobilisation  
562 in the female green sea turtle (*Chelonia mydas*). *J. Comp. Physiol. B Biochem. Syst.*  
563 *Environ. Physiol.* **172**, 485–493 (2002).
- 564 49. Brischoux, F., Lourdais, O., Boissinot, A. & Angelier, F. Influence of temperature,  
565 size and confinement on testosterone and corticosterone levels in breeding male spined  
566 toads (*Bufo spinosus*). *Gen. Comp. Endocrinol.* **269**, 75–80 (2018).
- 567 50. Tschirren, B., Sendecka, J., Groothuis, T. G. G., Gustafsson, L. & Doligez, B.

- 568 Heritable variation in maternal yolk hormone transfer in a wild bird population. *Am.*  
569 *Nat.* **174**, 557–564 (2009).
- 570 51. Stiebens, V. A. *et al.* Living on the edge : how philopatry maintains adaptive potential.  
571 *Proc. R. Soc.* **280**, 1–9 (2013).
- 572 52. Mrosovsky, N., Bass, A., Corliss, L. A., Richardson, J. I. & Richardson, T. H. Pivotal  
573 and beach temperatures for hawksbill turtles nesting in Antigua. *Can. J. Zool.* **70**,  
574 1920–1925 (1992).
- 575 53. Mrosovsky, N., Kamel, S. J., Díez, C. E. & van Dam, R. P. Methods of estimating  
576 natural sex ratios of sea turtles from incubation temperatures and laboratory data.  
577 *Endanger. Species Res.* **8**, 147–155 (2009).
- 578 54. Wibbels, T., Hanson, J., Balazs, G., Hillis-Starr, Z.-M. & Phillips, B. Blood sampling  
579 techniques for hatchling cheloniid sea turtles. *Herpetol. Rev.* **29**, 218–220 (1998).
- 580 55. Girondot, M. Statistical description of temperature-dependent sex determination using  
581 maximum likelihood. *Evol. Ecol. Res.* **1**, 479–486 (1999).
- 582 56. Schwabl, H. Yolk is a source of maternal testosterone for developing birds. *Proc. Natl.*  
583 *Acad. Sci. U. S. A.* **90**, 5 (1993).
- 584 57. Monsinjon, J. *et al.* Embryonic growth rate thermal reaction norm of Mediterranean  
585 *Caretta caretta* embryos from two different thermal habitats, Turkey and Libya.  
586 *Chelonian Conserv. Biol.* **16**, 172–179 (2017).
- 587 58. Houghton, J. D. R. *et al.* Protracted rainfall decreases temperature within leatherback  
588 turtle (*Dermochelys coriacea*) clutches in Grenada, West Indies: Ecological  
589 implications for a species displaying temperature dependent sex determination. *J. Exp.*  
590 *Mar. Bio. Ecol.* **345**, 71–77 (2007).

- 591 59. Lolavar, A. & Wyneken, J. Effect of rainfall on loggerhead turtle nest temperatures,  
592 sand temperatures and hatchling sex. *Endanger. Species Res.* **28**, 235–247 (2015).
- 593 60. Al-Habsi, A. A. *et al.* Plasma hormone levels in the green turtles *Chelonia mydas*  
594 during peak period of nesting at Ras Al-Hadd-Oman. *J. Endocrinol.* **191**, 9–14 (2006).
- 595 61. Rostal, D. C. *et al.* Changes in gonadal and adrenal steroid levels in the leatherback  
596 sea turtle (*Dermochelys coriacea*) during the nesting cycle. *Gen. Comp. Endocrinol.*  
597 **122**, 139–147 (2001).
- 598 62. Rostal, D. C., Paladino, F. V., Patterson, R. M. & Spotila, J. R. Reproductive  
599 physiology of nesting leatherback turtles (*Dermochelys coriacea*) at Las Baulas  
600 National Park, Costa Rica. *Chelonian Conserv. Biol.* **2**, 230–236 (1996).
- 601 63. Dobbs, K. A., Miller, J. D., Owens, D. W. & Landry Jr., A. M. Serum testosterone and  
602 estradiol 17 $\beta$  levels during the peak period in a year-round hawksbill turtle,  
603 *Eretmochelys imbricata* L. nesting population. *Pacific Conserv. Biol.* **13**, 151–157  
604 (2007).
- 605 64. Myre, B. L., Guertin, J., Selcer, K. & Valverde, R. A. Ovarian dynamics in free-  
606 ranging loggerhead sea turtles (*Caretta caretta*). *Copeia* **104**, 921–929 (2016).
- 607 65. Kobayashi, S. *et al.* The effects of nest incubation temperature on embryos and  
608 hatchlings of the loggerhead sea turtle: Implications of sex difference for survival rates  
609 during early life stages. *J. Exp. Mar. Bio. Ecol.* **486**, 274–281 (2017).
- 610
- 611
- 612
- 613
- 614



615

616

617

618

619

620

621 **Figures**

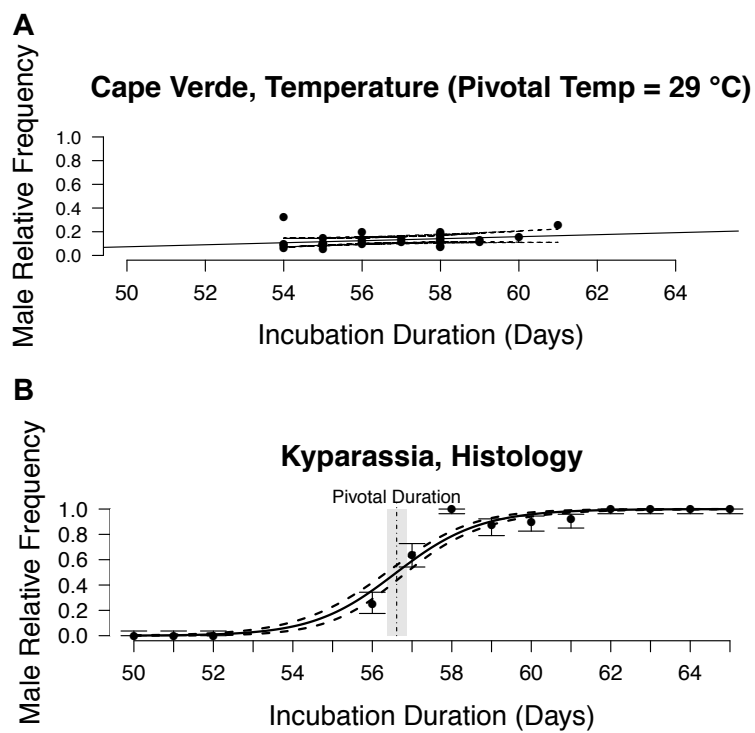

622

623 **Fig. 1: Sex ratios of study clutches A) as would be expected with a pivotal temperature**

624 **of 29 °C B) based on the relationship between incubation duration and clutch sex ratios**

625 **in Kyparassia (Greece)<sup>36</sup>**

626

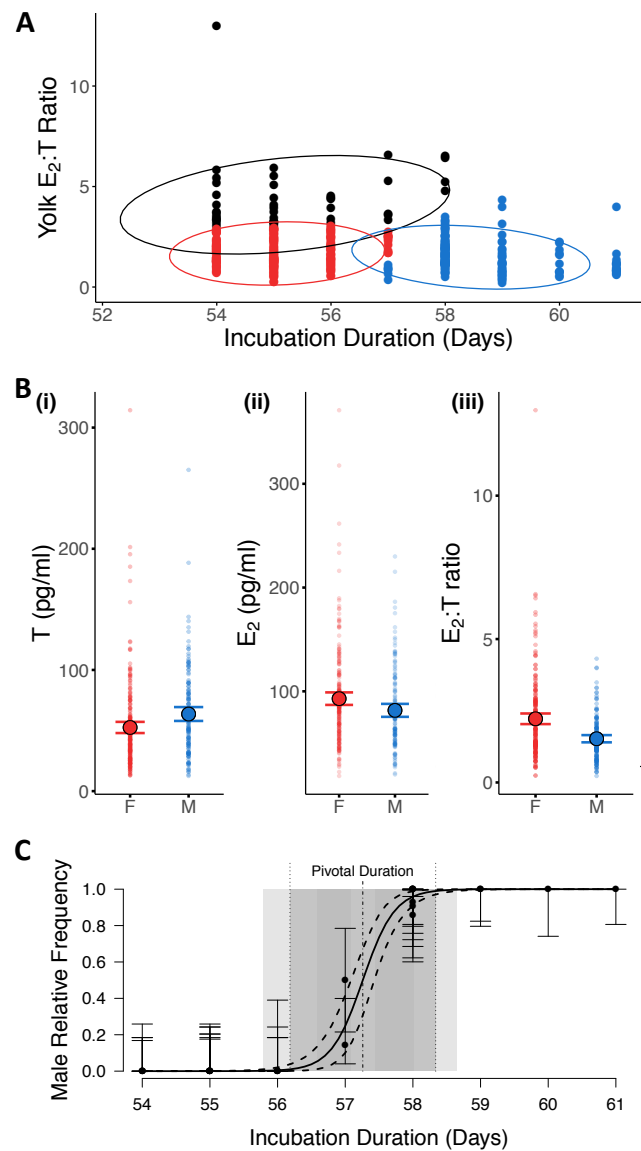

627

628 **Fig. 2: Individual sex as calculated by affinity propagation clustering (APC). A) APC**  
629 **identifies three different clusters based on individual E<sub>2</sub>:T ratio and clutch incubation**  
630 **duration. These clusters equate to female (red and black) and male (blue) offspring; B)**  
631 **Significant differences in the concentrations of T ( $F_{1,60} = 10.673$ ,  $p = 0.002$ ), E<sub>2</sub> ( $F_{1,57} =$**   
632  **$7.521$ ,  $p = 0.008$ ) and the E<sub>2</sub>:T ratio ( $F_{1,48} = 28.652$ ,  $p < 0.001$ ) between male and female**  
633 **offspring (mean, 95% confidence intervals and raw data are shown); C) Frequency of**  
634 **male offspring estimated by APC in relation to incubation duration. The pivotal**  
635 **duration was estimated at 57.25 days.**

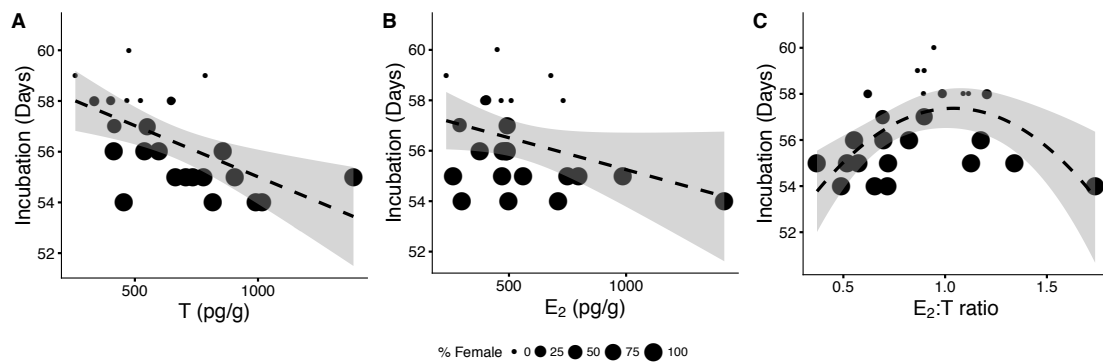

636

637 **Fig. 3: Relationship between maternally derived A) Testosterone T ( $F_{1,22} = 10.624$ ,  $p =$**   
638 **0.003), B) Estradiol  $E_2$  ( $F_{1,23} = 3.169$ ,  $p = 0.088$ ) and C)  $E_2:T$  ratio ( $F_{1,21} = 12.882$ ,  $p =$**   
639 **0.002) and concentrations within egg yolks and incubation duration. Size of data points**  
640 **relates to the sex ratio as proportion of females as determined by APC.**

641

642

643

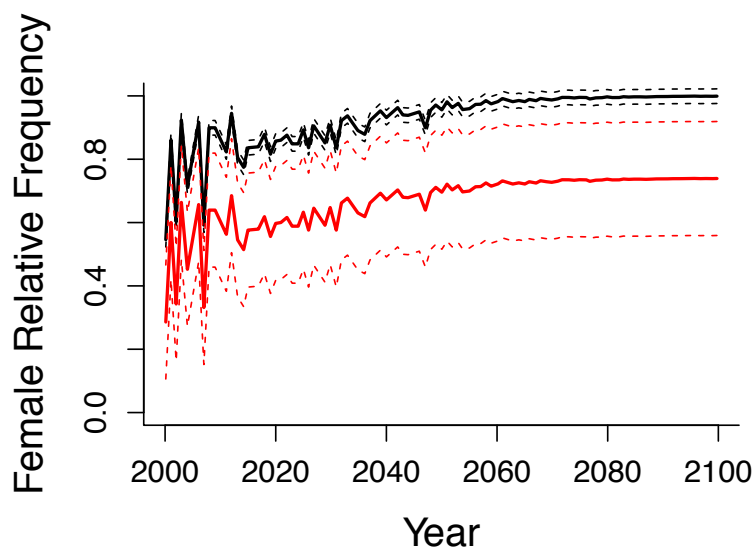

644

645 **Fig. 4: The population sex ratio of Cape Verde over the next century if it was**  
646 **determined by temperature alone <sup>4</sup> (black) and incorporating the effect of hormones**  
647 **observed here on the sex determining mechanism (red) along with the 95% confidence**  
648 **intervals.**
