1 **Maternally derived sex steroid hormones impact sex ratios of loggerhead sea**  
2 **turtles**

3  
4 **Authors:** Emma C. Lockley<sup>1</sup>, Thomas Reischig<sup>2</sup>, Christophe Eizaguirre<sup>1</sup>

5 <sup>1</sup>Queen Mary University of London, School of Biological and Chemical Sciences, Mile  
6 End Road, London E14NS, United Kingdom.

7 <sup>2</sup>Turtle Foundation, An der Eiche 7a, 50678 Cologne, Germany.

8 **Corresponding Author:** Emma Lockley, Queen Mary University of London, School  
9 of Biological and Chemical Sciences, Mile End Road, London E14NS, United  
10 Kingdom. e.lockley@qmul.ac.uk

11

12

13

14

15

16

17

18 **Keywords:**

19 Temperature-dependent sex determination, Maternal effects, Loggerhead sea turtle,  
20 Hormone transfer, Conservation, Climate Change

## 21 **Abstract**

22 An optimal sex ratio is arguably one of the most important demographic traits of  
 23 species. Rising global temperatures threaten temperature-dependent sex  
 24 determination (TSD) species with extreme sex ratio bias and ultimately extinction.  
 25 Because sex steroid hormones can impact sex determination in TSD reptiles,  
 26 variation in their maternal transfer within the egg yolk may form a buffer mechanism  
 27 against raising temperatures. We tested this hypothesis by quantifying the effect of  
 28 maternal oestradiol ( $E_2$ ) and testosterone (T) on offspring sex in a threatened TSD  
 29 population of loggerhead sea turtles (*Caretta caretta*). Circulating levels of  $E_2$  and T  
 30 in nesting females, in egg yolks at oviposition and in neonates were measured.  
 31 Immediately after oviposition, nests were relocated into an *in situ* experimental  
 32 hatchery where temperatures were controlled by standardising the incubation depth.  
 33 We used affinity propagation clustering on hormone profiles guided by incubation  
 34 duration, to sex individuals from these nests in a non-lethal manner, offering a novel  
 35 conservation tool for this endangered species. Despite standardised temperatures,  
 36 we found a large level of variation in the sex ratio of clutches, which correlated in a  
 37 non-linear manner with maternal investment of the  $E_2$ :T ratio in egg yolks. Males  
 38 were produced at equal levels of  $E_2$  and T and females were produced on either side  
 39 of this optimum. Modelling sex ratios for the coming century, we show that  
 40 maternally-derived hormones form a trans-generational mechanism of TSD plasticity  
 41 that adjusts offspring sex ratios in endangered sea turtles.

42

## 43 **Introduction**

44 Fifty years after the discovery of environmental sex determination, our understanding  
 45 of its evolutionary significance, underlying mechanisms and ecological  
 46 consequences in the light of environmental change remains incomplete<sup>1-5</sup>. Most  
 47 reptile and some fish species undergo temperature-dependent sex determination  
 48 (TSD), in which gonad differentiation is determined by temperature at a critical period  
 49 of embryogenesis<sup>6,7</sup>. Some species produce males at moderate temperatures and  
 50 females at hot and cold extremes (e.g. the American alligator *Alligator*  
 51 *mississippiensis*<sup>8</sup>, Type II TSD), but, more commonly, TSD species produce an  
 52 increasing proportion of a specific sex across a range of incubation temperatures  
 53 (Type Ia: Males at low temperatures, e.g. the painted turtle *Chrysemys picta*<sup>9</sup>; Type  
 54 Ib: Females at low temperatures, e.g. the tuatara *Sphenodon punctatus*<sup>10</sup>). In all  
 55 cases, both sexes are produced across a transitional range of temperatures (TRT),  
 56 centered on a pivotal temperature at which both sexes develop in equal proportions.  
 57 Because of TSD, rising global temperatures present the potential for extreme sex  
 58 ratio biases, with implications for population dynamics<sup>4</sup> and increased risks of  
 59 extinction.

60 The adaptive value of TSD is still debated, but fitness advantages under sex-specific  
 61 thermal environments are predicted by the widely favoured Charnov-Bull theory of  
 62 differential fitness<sup>11,12</sup>. This has been demonstrated in eggs of the Jacky dragon  
 63 (*Amphibolurus muricatus*) that were experimentally treated with an aromatase  
 64 inhibitor, constraining embryos to develop as males at female producing  
 65 temperatures. These males showed lower lifetime reproductive success than  
 66 controls<sup>3</sup>. While demonstrating the adaptive value of TSD, the use of an aromatase  
 67 inhibitor to manipulate sex in this study also highlights the role of sex steroid  
 68 hormones on the TSD mechanism<sup>13-15</sup>.

69 Exogenous application of oestradiol (E<sub>2</sub>) is known to feminise TSD embryos  
 70 incubated at male-producing temperatures<sup>16-19</sup>. In addition, the application of  
 71 testosterone (T), the precursor androgen of E<sub>2</sub>, also feminises embryos via the  
 72 synthesis of E<sub>2</sub> from T by the aromatase enzyme<sup>17,20</sup>, and indeed the use of  
 73 aromatase inhibitors can force male development<sup>21,22</sup>. Both temperature and  
 74 exogenous treatment with E<sub>2</sub> activate the same molecular pathways, altering the  
 75 transcription of the chromatin modifier gene *Kdm6b*, and conferring sensitivity to a  
 76 sex-determining gene, *Dmrt1*<sup>2</sup>.

77 In model TSD species that exhibit Type 1a TSD, the slider (*Trachemys scripta*) and  
 78 the painted turtle, maternal transfer of sex steroid hormones into eggs varies  
 79 seasonally<sup>13,23</sup>. Elevated concentrations of yolk E<sub>2</sub> and greater E<sub>2</sub>:T ratios increase

the likelihood of feminisation at a given temperature, effectively reducing the pivotal temperature of a clutch<sup>13,23</sup>. Should these patterns be found in non-model species, variation in maternal hormone transfer to eggs may be a universal mechanism to (i) change the threshold at which temperature affects an individual's sex, (ii) modify the sex ratio of the clutch, and (iii) buffer against the negative effects of rapid global temperature increase.

There is a particular need to understand the impacts of climate change on the demographics of threatened species. As a consequence of rising temperatures, extreme feminisation of sea turtle populations has been forecast by the end of the century<sup>4,24–26</sup>. Some studies already suggest effects are already visible in adult populations<sup>25</sup>. Yet, predictions mostly assume a fixed population-wide pivotal temperature with no account for physiological mechanisms that may increase variation in this trait and therefore on sex ratio. Understanding possible mechanisms has been constrained in sea turtles in particular by the lack of non-lethal methods to sex neonates. This issue is especially important for endangered populations, where sacrificing individuals is not possible.

Here, focusing on loggerhead turtles (*Caretta caretta*) nesting in the Cabo Verde archipelago, we standardised the thermal environment of clutches in an experimental field hatchery, exposed to natural conditions. Should temperature be the sole driver of sex determination, under standardised thermal conditions we would expect to observe similar sex ratios among clutches. Alternatively, any inter-clutch variation would likely arise from intrinsic characteristics of the eggs, such as maternally derived hormones. To test this alternative hypothesis, we quantified E<sub>2</sub> and T concentrations in the plasma of nesting females, their egg yolks and neonates. We developed a non-lethal method using circulatory hormone profiles of neonates, and determined the clutches' sex ratios. Inter-clutch variation in sex ratio was then linked to yolk hormone concentrations. Finally, we illustrate how maternal hormone transfer impacts sex ratio in the face of IPCC climate change predictions, by re-parameterising a previously used mathematical model<sup>4</sup> to forecast the future population dynamics of this endangered nesting aggregation.

110

## 111 **Results**

This study focused on loggerhead turtles nesting on the island of Boavista in the Cape Verde archipelago. First, using enzyme-linked immunosorbent assays (ELISA – Enzo LifeSciences), we quantified concentrations of the sex steroid hormones E<sub>2</sub> and T in both the blood plasma of 26 nesting females and up to two of their eggs directly after oviposition. Clutch sizes were recorded at this time. High levels of

individual variation were observed in adult plasma hormone levels (SI appendix, Table S1), with a mean T concentration of  $1148.48 \pm 148.63$  (SE) pg/ml, a mean  $E_2$  concentration of  $235.79 \pm 22.71$  (SE) pg/ml, and a mean  $E_2:T$  ratio of  $0.32 \pm 0.05$  (SE). Linear models (LM) showed positive correlations between  $E_2$  and T in both the female plasma (SI Appendix, Fig. S1A,  $F_{1,16} = 4.608$ ,  $p = 0.048$ ) and their egg yolks (SI Appendix, Fig. S1B,  $F_{1,23} = 7.338$ ,  $p = 0.013$ ). In reptiles, maternally derived hormones are constant across all eggs of a given clutch<sup>27</sup>, which we confirmed with a subset of clutches where two egg yolks were analysed (Paired t-tests: T:  $df = 11$ ,  $t = 0.224$ ,  $p = 0.827$ ;  $E_2$ :  $df = 10$ ,  $t = -0.885$ ,  $p = 0.397$ ;  $E_2:T$ :  $df = 9$ ,  $t = -1.173$ ,  $p = 0.271$ ).

There was a significant non-linear correlation between T concentrations in adult plasma and egg yolks (SI appendix, Fig. S2A: LM:  $F_{1,14} = 5.263$ ,  $p = 0.038$ ), where concentrations of yolk T were lowest in eggs originating from females with intermediate levels of plasma T, but did not correlate with clutch size (SI appendix, Fig. S2B:  $F_{1,14} = 0.032$ ,  $p = 0.862$ ). In contrast, adult female plasma  $E_2$  concentrations were not correlated with  $E_2$  in the egg yolk (SI appendix, Fig. S2C: LM:  $F_{1,21} = 0.908$ ,  $p = 0.351$ ), but as clutch size increased, yolk  $E_2$  concentrations significantly decreased (SI Appendix, Fig. S2D: LM:  $F_{1,21} = 4.945$ ,  $p = 0.037$ ). The maternal  $E_2:T$  ratio showed a non-linear relationship with the  $E_2:T$  ratio in the egg yolk (SI Appendix, Fig. S2E:  $F_{1,14} = 6.493$ ,  $p = 0.023$ ), and was not correlated with clutch size (SI Appendix, Fig. S2F:  $F_{1,14} = 1.682$ ,  $p = 0.215$ ).

Immediately after oviposition, the clutches of these 26 females and two others ( $n = 28$ ) were relocated into an *in-situ* experimental hatchery that was protected from predation, yet exposed to natural sand and weather conditions. We buried clutches at a depth of 55 cm to standardise the thermal incubation environment. We confirmed the standardised thermal environment using data loggers placed at the centre of the clutch (mean thermosensitive period temperature =  $30.02 \pm 0.05$  (SE) °C, SI Appendix, Fig. S3). The small amount of temperature variation observed was explained by differences in clutch size ( $F_{1,26} = 4.418$ ,  $p = 0.045$ ), resulting from increased metabolic heat produced from more developing embryos in larger clutches<sup>28</sup>. Assuming the pivotal temperature of this population to be 29 °C, as has previously been used for this population<sup>4</sup>, this incubation temperature would produce  $12.89 \pm 0.01$  (SE) % male offspring if temperature was the sole determinant of sex ratio (Fig. 1A). Incubation duration, the time between oviposition and neonate emergence, is also often used as a proxy to predict offspring sex ratios (e.g.  $r^2 = 0.73$  in nests in Brazil<sup>29</sup>) and was recorded for each clutch<sup>29</sup>. Using the established logistic relationship between incubation duration and sex ratio observed in loggerhead turtles

154 from Kyparissia, Greece (Fig. 1B, the closest location where the relationship between  
155 incubation duration and offspring sex ratio has been quantified), the predicted sex  
156 ratio of our study clutches would be  $47.5 \pm 6$  (SE) % males<sup>30</sup>. This suggests that  
157 levels of sex ratio variation are far greater than those we would expect from  
158 temperature alone.

159 While the incubation duration represents a reasonable proxy for estimating the sex  
160 ratio of sea turtle offspring, currently the only accurate method to resolve individual  
161 sex requires sacrificing neonates and histological examination - a limiting factor for  
162 endangered populations<sup>29,31</sup>. However, we developed a new method to ascertain  
163 individual sex without the need to sacrifice animals. After taking 100 – 150 µl of blood  
164 from 365 offspring from 28 clutches after emergence (mean offspring per clutch =  $13 \pm 4$  (SE)), we measured plasma hormone concentrations using ELISA. Hatchling  
165 hormone levels varied among individuals (SI Appendix, Table S1) and among  
166 clutches, with the average  $E_2:T$  ratio of clutches ranging from  $1.06 \pm 0.13$  (SE) to  
167  $3.56 \pm 0.68$  (SE). We used affinity propagation clustering (APC) on hatchling  $E_2:T$   
168 ratios guided by incubation duration to identify clusters of individuals with a similar  
169 hormonal phenotype. APC iteratively considers the similarity of a data point to its  
170 neighbours. Importantly, it does not require the number of possible clusters to be  
171 defined *a priori*, as is necessary for other clustering approaches such as k-means<sup>32</sup>.  
172 We identified three APC clusters (Fig. 2A). Two of these originate from clutches with  
173 short incubation durations, the classic trait of female neonates, and were  
174 distinguished by differences in their mean  $E_2:T$  ratio (SI Appendix, Fig. S4, Cluster 1:  
175 mean =  $4.45 \pm 0.26$  (SE), Cluster 2: mean =  $1.72 \pm 0.05$  (SE), t-test: df = 44.08, t =  
176 10.273, p < 0.001). The third group is formed by individuals from clutches with longer  
177 incubation durations (t-test: df = 299.3, t = -32.933, p < 0.001) and a low  $E_2:T$  ratio  
178 (SI Appendix, Fig. S4, mean =  $1.52 \pm 0.06$  (SE)), the characteristics of male sea  
179 turtle neonates.  
180

181 Several positive theoretical controls were used to confirm this method since neonate  
182 sacrificing is not possible. First, linear mixed effect models (LMM) using clutch ID as  
183 a random factor revealed significant differences in hormone levels between the two  
184 sexes, that were directly comparable to previous studies in which individuals' sex  
185 was confirmed through histology<sup>33,34</sup>. As expected, T levels were higher in males  
186 (Fig. 2Bi, LMM:  $F_{1,60} = 10.673$ , p = 0.002, mean =  $63.63 \pm 2.89$  (SE) pg/ml) than in  
187 females (mean =  $52.54 \pm 2.34$  (SE) pg/ml), and conversely  $E_2$  levels were higher in  
188 females (Fig. 2Bii, LMM:  $F_{1,57} = 7.521$ , p = 0.008, mean =  $92.94 \pm 3.06$  (SE) pg/ml)  
189 than in males (mean =  $81.66 \pm 3.16$  (SE) pg/ml), as was the overall  $E_2:T$  ratio (Fig.  
190 2Biii, LMM:  $F_{1,48} = 28.652$ , p < 0.001, females: mean =  $2.22 \pm 0.09$  (SE); males:

mean =  $1.52 \pm 0.06$  (SE)). LMMs did not detect any difference in weight ( $F_{1, 348} = 0.024$ ,  $p = 0.878$ ) or size ( $F_{1, 218} = 0.766$ ,  $p = 0.382$ ) between the sexes, as would be expected under these conditions by the Charnov-Bull theory<sup>11</sup>. Second, by combining individual offspring sex into an estimate of clutch sex ratio, and comparing this to the incubation duration, we found the specific logistic regression curve that characterises incubation durations in Type Ia TSD species (Fig. 2C). The pivotal duration was fitted to a value of 57.25 days (95% CIs: 57.09, 57.43), with a transitional range of incubation durations of 2.15 days (95% CIs: 1.52, 2.77). Importantly, if individual sex were incorrectly assigned, this distinctive pattern of TSD species would not be seen. With this method we determined that clutch sex ratios were on average  $40.49 \pm 8.98$  (SE) % male (Fig. 1C). This suggests 26.1% more males and far more variation in clutch sex ratio than would be expected based on incubation temperatures alone. Our sex ratio estimate is slightly below (7.1%) that estimated from parameters based on incubation durations in Kyparissia, suggesting population differences in development rate exist, likely as a result of different average pivotal temperatures among rookeries. After establishing that the inter-clutch variation in sex ratio (and also in incubation duration, see SI Appendix) was too great to be produced by temperature alone, we tested whether metabolic heat and/or maternal hormone transfer in the yolk predicted incubation duration and the estimated sex ratio. Yolk T correlated negatively with both incubation duration (LM,  $F_{1,22} = 10.624$ ,  $p = 0.003$ ) and the proportion of males produced within a clutch (Fig. 3A, Binomial generalised linear mixed effect models (GLMM),  $\chi^2 = 4.371$ ,  $df = 1$ ,  $p = 0.037$ ), but metabolic heat had no detectable effect (incubation duration model:  $F_{1,22} = 2.436$ ,  $p = 0.133$ , sex ratio model:  $\chi^2 = 2.111$ ,  $df = 1$ ,  $p = 0.146$ ). There was no relationship between yolk  $E_2$  and incubation duration or clutch sex ratio (Fig. 3B, incubation duration:  $F_{1,23} = 3.169$ ,  $p = 0.088$ , sex ratio:  $\chi^2 = 0.183$ ,  $df = 1$ ,  $p = 0.669$ ), yet the yolk  $E_2$ :T ratio showed a non-linear relationship with both incubation duration (Fig. 3C,  $F_{1,21} = 12.882$ ,  $p = 0.002$ ) and sex ratio independently of temperature ( $\chi^2 = 7.064$ ,  $df = 2$ ,  $p = 0.029$ ). A maximum incubation duration of 57.2 days was observed at an equal hormone ratio ( $E_2$ :T of 1.05,  $y = -7.8x^2 + 16.3x + 48.7$ ) with the highest levels of male offspring developing at this point. Male offspring production was highest when maternal investment of  $E_2$  and T to the yolk was equal. Asking whether the production of either sex is more costly in terms of total hormone investment, we compared the total hormone concentration ( $E_2 + T$ ) with the overall  $E_2$ :T ratio. This relationship was again non-linear, with total hormone investment being highest when the  $E_2$ :T ratio was unequal (LM:  $F_{2,22} = 4.951$ ,  $p =$



0.017), suggesting that producing females requires more maternal investment than males. The total hormone investment also showed a non-linear relationship with clutch size ( $\log(E_2 + T)$ :  $F_{2,22} = 4.306$ ,  $p = 0.026$ ), with an initial increase in investment across clutch sizes between 65 and 75 eggs, after which investment declined with increasing clutch size.

Finally, to illustrate how maternal hormone transfer could impact population dynamics, we re-parameterised a mathematical model of neonate sex ratio for the Cape Verde population<sup>4</sup> based on IPCC climate emission prediction SRES2, from the Fourth Assessment Report released in 2007. We made the simple assumption that the effect of maternally derived hormones on sex ratio is constant across a thermal gradient and applied the 26.1% observed difference in male offspring production for the coming century (Fig. 4). With a mechanism of this possible strength, the population is unlikely to reach the levels of extreme feminisation previously forecasted – instead of female production reaching over 97% in 2100, it is likely to instead reach approximately 71%. As it remains to be determined how maternal hormone transfer interacts with different incubation temperatures, this model can only illustrate the potential importance of trans-generational hormone transfer for population dynamics.

## Discussion

Given the many considerable historical climate shifts experienced by TSD species, they are likely to have evolved mechanisms to avoid unviable biases in offspring sex ratio<sup>5</sup>. By experimentally standardising the thermal environment of loggerhead sea turtle nests *in-situ*, we investigated whether maternally derived hormones correlate with offspring sex independently of temperature. First, we developed a non-lethal method to determine neonate sex upon nest emergence, using affinity propagation clustering, which considers individual circulatory sex steroid hormones in relation to their incubation duration. We found a non-linear relationship between the clutch sex ratios and the ratio of maternally derived  $E_2:T$  within the egg yolk under standardised thermal conditions. Low concentrations of equal investment in both hormones within the yolk maximise the production of male offspring, while increasing the concentration of either  $E_2$  or  $T$ , along with overall hormone investment, feminises the clutches. By re-parameterising an existing model that predicts sex ratio biases in response to climate change, we demonstrated that this trans-generational mechanism could prevent extreme feminisation loggerhead turtles in Cabo Verde.

To date, an inability to determine neonate sex non-lethally has constrained the study of TSD mechanisms in endangered sea turtles. A clustering approach that identifies



individuals with similar phenotypes (here hormone profiles) that match control traits of male and female offspring (incubation duration) overcame this problem. Using  $E_2:T$  thresholds to define neonate sex has been verified with histological analysis in loggerhead<sup>34</sup> and green<sup>33</sup> turtles, but as  $E_2:T$  levels vary considerably between clutches, it is difficult to delineate thresholds *a priori*. Using an APC method guided by incubation duration to group hormone profiles, a common proxy for sex ratio, we avoid the need to define thresholds and, importantly, the need to sacrifice individuals<sup>29</sup>. There is strong evidence for the reliability of this method, as (i) circulating  $E_2:T$  ratios of male and female offspring identified in this study and (ii) pivotal duration, both match those reported in other studies<sup>30,33–36</sup>, and (iii) the relationship between sex ratio and incubation duration fits the known logistic regression curve observed in Type Ia TSD species. We anticipate that this non-lethal approach will prove an invaluable tool for both research on TSD in sea turtle species and also for wider conservation.

Despite the standardised thermal environment of clutches within this experiment, high levels of variation in incubation duration and sex ratio were observed, which correlated with maternally derived hormones within the egg yolk. The relationship between the yolk  $E_2:T$  ratio and clutch sex ratio was best described by a quadratic curve, centred on an equal concentration of both hormones and ranging from 0.37 to 1.73. When maternal investment of  $E_2$  and T was equal, incubation durations were long, and males were produced. If hormone investment was biased in either direction, sex ratios became increasingly feminised. The effects of elevated levels of both  $E_2$  and T on sex ratio in this study are consistent with experimental manipulation of these hormones in other species<sup>2,17,19</sup>. Interestingly, in all other reptiles for which data is available, the  $E_2:T$  ratios that are transferred to the yolk consistently remain below or above the ratio of one<sup>37</sup>. Thus, our study is the only example of both hormones influencing the feminisation process of reptiles under natural conditions.

Total hormone concentrations within the yolk were lowest at an equal  $E_2:T$  ratio. If this ratio departed from one in either direction, total concentrations of yolk hormones increased. As  $E_2$  and T positively correlate within the egg, if investment in either hormone is elevated, there is an associated increase in the other. The outcome is that greater investment is required to skew  $E_2:T$  ratios in a manner that favours the production of female offspring. When  $E_2:T$  ratios are skewed, and total hormone concentrations are high, feminisation is easily achieved through either the presence of  $E_2$  directly, or by the synthesis of  $E_2$  from its precursor, T, by the aromatase enzyme. When  $E_2$  and T are in equilibrium, low concentrations of  $E_2$  are not sufficient

301 to feminise the clutch. However, product-feedback inhibition likely prevents further  $E_2$   
302 being synthesised from T, and consequently male offspring are produced.

303 There is no doubt that temperature is the primary determinant of sex in TSD species,  
304 yet there is growing evidence that  $E_2$  and, indirectly, T affect the same developmental  
305 pathways<sup>2,19</sup>. Accordingly, a clutch specific threshold exists for feminisation that is the  
306 product of both temperature and maternal hormone transfer. A shift towards an equal  
307  $E_2$ :T ratio and lower maternal investment will increase the pivotal temperature away  
308 from the feminisation threshold, and consequently warmer temperatures would be  
309 required to feminise a clutch. This aligns with sex ratios observed here, which  
310 contained 26.1% more males than expected from a pivotal temperature of 29 °C.  
311 However, this mechanism will be constrained by physiological limits of maternal  
312 hormone investment.

313 Two maternal traits show a relationship with levels of hormone transfer to the clutch.  
314 Firstly, T concentrations within the yolk correlated non-linearly with those in maternal  
315 plasma. Disentangling the cause of such a relationship is complex as it is likely to  
316 result from multiple physiological cascades<sup>38</sup>. However, this relationship does allow  
317 us to link T investment to maternal state. Should maternal T vary in response to  
318 environmental cues, as in the spined toad (*Bufo spinosus*), it may allow nesting  
319 females to plastically match the individual development threshold of feminisation to  
320 the ambient temperature, and maintain more constant sex ratios across a nesting  
321 season<sup>39</sup>. Similarly, differences in the maternally-transferred  $E_2$ :T ratio in the egg yolk  
322 of a population of painted turtles resulted in a seasonal shift of the pivotal  
323 temperature<sup>13</sup>. Secondly, total  $E_2$  investment within eggs decreased as clutch size  
324 increased, and total hormone concentrations were low in large clutches. Thus, in  
325 large clutches with more metabolic heat production, the developmental threshold of  
326 feminisation is increased – minimizing sex bias. We infer from these results that  
327 there are two distinct mechanisms that can affect the ratio of  $E_2$ :T within the yolk,  
328 which explains how elevated investment in either hormone can lead to feminisation.

329 There is considerable variation in circulating T and  $E_2$  levels between sea turtle  
330 populations and species (SI Appendix, Table S1), which may suggest an element of  
331 local adaptation in response to environmental conditions, and a heritable component  
332 of baseline physiological levels<sup>40</sup>.

333 Overall, our work highlights a previously under-considered physiological mechanism  
334 for individual variation in the TSD process within sea turtle species. There is a need  
335 for management plans that use temperature-based models to predict future sex  
336 ratios to account for maternal hormonal influence, as this will have considerable  
337 implications for population dynamics.

338

## 339 **Methods**

### 340 *Sample Collection*

341 We studied nesting loggerhead sea turtles on the island of Boavista, part of the Cabo  
342 Verde archipelago in the eastern Atlantic. The sampling site (15°58'18.6"N,  
343 22°48'06.2"W) is a 400 m stretch of coastline on the southern tip of this island.  
344 Twenty-eight nesting females were sampled between 17 July and 1 August 2017.  
345 Immediately after oviposition, females were individually marked with PIT (AVID) and  
346 metal (Inconel) tags<sup>41</sup>. Blood samples of 1-4 ml in volume were collected from the  
347 dorsal cervical sinus of 26 females using a 40 mm, 21-gauge needle and 5 ml  
348 syringe, and stored within lithium heparin containers. Finally, curved carapace length  
349 (CCL) and width (CCW) were measured ( $\pm 0.1$  cm).

350 The clutches of these turtles (containing  $83 \pm 3$  (SE) eggs) were relocated to an  
351 experimental hatchery protected from predation, situated on the nesting beach. At  
352 this point, up to two eggs from the 28 clutches were removed from each clutch for  
353 yolk hormone analysis, and the rest of the clutch was buried at a depth of 55 cm. By  
354 using a standard depth, temperature was controlled for, while maintaining an  
355 otherwise natural environment. A TinyTag™ temperature logger was placed at the  
356 centre of each clutch, programmed to take a reading every 15 minutes throughout  
357 the incubation period (accuracy  $\pm 0.2$  °C). As anticipated, the uniform depth  
358 standardised the incubation temperature of the nests to  $30.05 \pm 0.05$  (SE) °C during  
359 the middle third of incubation, the period where embryo sex is established. This  
360 variation in temperature is extremely conserved, and is representative of the thermal  
361 variation produced within treatments under controlled laboratory incubations<sup>42,43</sup>.

362 Upon emergence, twenty hatchlings were randomly selected for blood sampling (100  
363 – 150  $\mu$ l) from the dorsal cervical sinus, using a 26-gauge needle and 1 ml syringe<sup>44</sup>.  
364 Samples were stored within lithium heparin coated tubes. Notch-to-notch straight  
365 carapace length (SCL) and, width (SCW) were measured using digital callipers ( $\pm$   
366 0.01 mm), and weight was measured with a digital scale ( $\pm 0.1$  g)).

367 The blood samples of both the adults and offspring were refrigerated for up to 48 h  
368 before being centrifuged to extract plasma. Egg yolks were separated from the  
369 albumen, and all samples were stored at -20 °C until extraction.

370

### 371 *Hormone extraction*

372 Commercially available Enzyme-Linked Immunosorbent Assay (ELISA) kits for both  
373 E<sub>2</sub> (Catalogue # ADI-900-174, ENZO Life Sciences) and T (Catalogue # ADI-900-  
374 065) were used to measure steroid levels in all samples. Details for hormone

375 extraction protocols are given in SI methods. Not all blood samples had sufficient  
376 volume for hormone extraction. Consequently, we extracted  $E_2$  from 24 adults and  
377 388 hatchling blood samples, and T from 19 adult and 367 hatchling blood samples.  
378 This provided us with  $E_2$ :T ratios for 18 adult females, and 365 hatchlings.  $E_2$ , and T  
379 were successfully extracted from the yolks of 26 out of the 28 sampled clutches.

380

### 381 *Statistical Analyses*

382 All analyses were conducted with R 3.3.3, using the R packages *lme4* and *lmerTest*  
383 for fitting linear mixed models (LMMs) and generalized linear mixed models  
384 (GLMMs). A paired t-test was used to compare intra-clutch  $E_2$  and T levels between  
385 two eggs in a subset of clutches ( $n = 13$ ), to test whether that there was variation in  
386 hormone investment between eggs in a clutch. As there was no difference between  
387 eggs from the same clutch, for subsequent analyses the average hormone was used  
388 where possible, while a single egg was used for the remainder of the clutches.  
389 Correlations between  $E_2$  and T in female plasma and yolks, the effect of clutch size  
390 on temperature, and the effects of metabolic heat and maternally derived hormones  
391 on incubation duration were tested using general linear models (LM). A non-linear  
392 relationship between the  $E_2$ :T ratio on incubation duration was fitted using a  
393 quadratic curve. Similarly, when considering the relationship between  $E_2$ :T and total  
394 hormone investment, we also fit a quadratic model. LMs were also used to estimate  
395 the correlation of clutch size and plasma hormone concentrations with yolk hormone  
396 concentrations.

397 We used Algorithm Propagation Clustering (APC) to identify individual sex, using the  
398 R package *apcluster*<sup>32</sup>. Cluster assignment was made based on the plasma  $E_2$ :T  
399 ratio of hatchlings, guided by their incubation duration. Determining neonate sea  
400 turtle sex using the  $E_2$ :T ratio has previously been extremely accurate (96% and  
401 96.7% respectively) for artificially incubated eggs of loggerhead and green sea  
402 turtles<sup>33,34</sup> that were ultimately sacrificed for verification. Since variation likely exists  
403 among rookeries, those thresholds however cannot be blindly applied to new  
404 populations. T-tests were used to compare hormone levels of putative male and  
405 female hatchlings. A response curve of these estimated sex ratios to incubation  
406 duration was produced using the logistic equation function of the R package  
407 *embryogrowth* to further verify the accuracy of our non-lethal sexing method.

408 After identifying the sex of individuals, LMMs were used to compare individual size  
409 and weight between the sexes and the APC clusters. Finally, we used binomial  
410 GLMMs to determine whether individual hatchling sex was predicted by maternal  
411 hormone investment or temperature. For all LMM and GLMM analyses, clutch was

412 included as a random factor to account for individual variation. Model selection was  
413 based on AIC criteria, using a likelihood ratio tests to select for the best models. P-  
414 values of the selected models were obtained by with the *car* R package, and models  
415 were verified for over-dispersion.

416 Thermal estimates of sex ratio were calculated using the equation first presented by  
417 Girondot in 1999, under an assumed pivotal temperature of 29 °C<sup>45</sup>. Estimates of sex  
418 ratio based on incubation duration were made based on data from a study on a  
419 neighbouring loggerhead sea turtle population that nests in Kyparissia, Greece, and  
420 was confirmed with histology<sup>30</sup>. To generate an illustrative model that compared the  
421 results of our study with future predictions based on temperature alone, we extracted  
422 data from a previously published study predicting sex ratios until 2100 based on  
423 temperature alone. We then compared our observed mean clutch sex ratio to that  
424 expected from a pivotal temperature of 29 °C, and added the difference, along with  
425 95% confidence intervals, to the original prediction.

426

## 427 **Acknowledgements**

428 We thank volunteers and staff from Turtle Foundation for facilitating this research.  
429 Particular thanks go to S. Cameron for considerable help during data collection. E.L  
430 was supported by a grant from the National Environment Research Council (grant  
431 NE/L002485/1). This study was supported by a National Geographic grant (NGS-  
432 59158R-19) as well as Queen Mary University of London Funds allocated to CE. We  
433 also acknowledge the support from ‘The Future Ocean’ Excellence Initiative by the  
434 Deutsche Forschungsgemeinschaft (DFG) that granted a ‘Capacity building grant’ to  
435 C.E. The authors would like to thank the Eizaguirre lab as well as Dr. Jose M. Duran  
436 and Dr. Gail Schoefield for their feedback on previous versions of the manuscript.

437

## 438 **References**

- 439 1. Charnier, M. Action of temperature on the sex ratio in the *Agama agama*  
440 (*Agamidae*, *Lacertilia*) embryo. *C R Seances Soc Biol Fil.* **160**, 620–622  
441 (1966).
- 442 2. Ge, C. *et al.* The histone demethylase KDM6B regulates temperature-  
443 dependent sex determination in a turtle species. *Science (80-. ).* **360**, 645–648  
444 (2018).
- 445 3. Warner, D. A. & Shine, R. The adaptive significance of temperature-dependent  
446 sex determination in a reptile. *Nature* **451**, 2006–2009 (2008).

- 447 4. Laloë, J.-O. *et al.* Climate change induced extinction does not seem imminent  
448 at an important sea turtle rookery. *Nat. Clim. Chang.* **4**, 1–7 (2014).
- 449 5. Mitchell, N. J. & Janzen, F. J. Temperature-Dependent sex determination and  
450 contemporary climate change. *Sex. Dev.* **4**, 129–140 (2010).
- 451 6. Bull, J. J. Sex Determination in Reptiles. *Q. Rev. Biol.* **55**, 3–21 (1980).
- 452 7. Deeming, D. C. *et al.* Environmental Regulation of Sex Determination in  
453 Reptiles (and Discussion). *Philos. Trans. R. Soc. B Biol. Sci.* **322**, 19–39  
454 (1988).
- 455 8. Ferguson, M. W. J. & Joanen, T. Temperature-dependent sex determination in  
456 Alligator mississippiensis. *J. Zool.* **200**, 143–177 (1983).
- 457 9. Bull, J. J. & Vogt, R. C. Temperature-Dependent Sex Determination in Turtles.  
458 *Science* (80-. ). **206**, 1186–1188 (1979).
- 459 10. Cree, A., Thompson, M. B. & Daugherty, C. H. Tuatara sex determination.  
460 *Nature* **375**, 543 (1995).
- 461 11. Charnov, E. . & Bull, J. . When is sex environmentally determined? *Nature*  
462 **266**, 828–830 (1977).
- 463 12. Shine, R. Why is sex determined by nest temperature in many reptiles?  
464 *Trends Ecol. Evol.* **14**, 186–189 (1999).
- 465 13. Bowden, R. M., Ewert, M. A. & Nelson, C. E. Environmental sex determination  
466 in a reptile varies seasonally and with yolk hormones. *Proc. R. Soc. B Biol.*  
467 *Sci.* **267**, 1745–1749 (2000).
- 468 14. Elf, P. K. Yolk steroid hormones and sex determination in reptiles with TSD.  
469 *Gen. Comp. Endocrinol.* **132**, 349–355 (2003).
- 470 15. Bowden, R. M. & Paitz, R. T. Temperature fluctuations and maternal  
471 estrogens as critical factors for understanding temperature-dependent sex  
472 determination in nature STUDIES ARE THE FOUNDATION OF TSD  
473 BETWEEN INCUBATION TEMPERATURES. *J. Exp. Biol. part A Ecol. Integr.*  
474 *Physiol.* 1–8 (2018). doi:10.1002/jez.2183
- 475 16. Crews, D., Bull, J. J. & Wibbels, T. Estrogen and sex reversal in turtles: A

- 476 dose-dependent phenomenon. *Gen. Comp. Endocrinol.* **81**, 357–364 (1991).
- 477 17. Crews, D., Wibbels, T. & Gutzke, W. H. N. Action of sex steroid hormones on  
478 temperature-induced sex determination in the snapping turtle (*Chelydra*  
479 *serpentina*). *Gen. Comp. Endocrinol.* **76**, 159–166 (1989).
- 480 18. Merchant-Larios, H., Ruiz-Ramirez, S., Moreno-Mendoza, N. & Marmolejo-  
481 Valencia, a. Correlation among thermosensitive period, estradiol response,  
482 and gonad differentiation in the sea turtle *Lepidochelys olivacea*. *Gen. Comp.*  
483 *Endocrinol.* **107**, 373–385 (1997).
- 484 19. Wibbels, T., Bull, J. J. & Crews, D. Synergism between temperature and  
485 estradiol: a common pathway in turtle sex determination? *J. Exp. Zool.* **260**,  
486 130–134 (1991).
- 487 20. Wibbels, T. & Crews, D. Specificity of steroid hormone-induced sex  
488 determination in a turtle. *J. Endocrinol.* **133**, 121–129 (1992).
- 489 21. Rhen, T. & Lang, J. W. Phenotypic Plasticity for Growth in the Common  
490 Snapping Turtle: Effects of Incubation Temperature, Clutch , and Their  
491 Interaction. *Am. Nat.* **146**, 726–747 (1995).
- 492 22. Wibbels, T. & Crews, D. Putative aromatase inhibitor induces male sex  
493 determination in a female unisexual lizard and in a turtle with temperature-  
494 dependent sex determination. *J. Endocrinol.* **141**, 295–299 (1994).
- 495 23. Carter, A. W., Bowden, R. M. & Paitz, R. T. Seasonal shifts in sex ratios are  
496 mediated by maternal effects and fluctuating incubation temperatures. *Funct.*  
497 *Ecol.* **31**, 876–884 (2017).
- 498 24. Hawkes, L., Broderick, A., Godfrey, M. & Godley, B. Climate change and  
499 marine turtles. *Endanger. Species Res.* **7**, 137–154 (2009).
- 500 25. Jensen, M. P. *et al.* Environmental warming and feminization of one of the  
501 largest sea turtle populations in the world. *Curr. Biol.* **28**, 154–159.e4 (2017).
- 502 26. Tanner, C., Marco, A., Martins, S., Abella-Perez, E. & Hawkes, L. Highly  
503 feminised sex ratio estimations for the world's third-largest nesting aggregation  
504 of the loggerhead sea turtle. *Mar. Ecol. Prog. Ser.* **621**, 209–219 (2019).
- 505 27. Janzen, J., Wilson, M. E., Tucker, J. K. & Ford, S. P. Endogenous Yolk Steroid



- 506 Hormones in Turtles with Different Sex-Determining Mechanisms. *Gen. Comp.*  
507 *Endocrinol.* **111**, 306–317 (1998).
- 508 28. DeGregorio, B. A. & Williard, A. S. Incubation Temperatures and Metabolic  
509 Heating of Relocated and In Situ Loggerhead Sea Turtle ( *Caretta caretta* )  
510 Nests at a Northern Rookery. *Chelonian Conserv. Biol.* **10**, 54–61 (2011).
- 511 29. Mrosovsky, N., Baptistotte, C. & Godfrey, M. H. Validation of incubation  
512 duration as an index of the sex ratio of hatchling sea turtles. *Can. J. Zool.* **77**,  
513 831–835 (1999).
- 514 30. Mrosovsky, N., Kamel, S., Rees, A. F. & Margaritoulis, D. Pivotal temperature  
515 for loggerhead turtles ( *Caretta caretta* ) from Kyparissia Bay, Greece. *Can. J.*  
516 *Zool.* **80**, 2118–2124 (2002).
- 517 31. Ceriani, S. A. & Wyneken, J. Comparative morphology and sex identification of  
518 the reproductive system in formalin-preserved sea turtle specimens. *Zoology*  
519 **111**, 179–187 (2008).
- 520 32. Frey, B. J. & Dueck, D. Clustering by passing messages between data points.  
521 *Science (80-. )*. **315**, 972–976 (2007).
- 522 33. Xia, Z.-R., Li, P.-P., Gu, H.-X., Fong, J. J. & Zhao, E.-M. Evaluating  
523 Noninvasive Methods of Sex Identification in Green Sea Turtle (*Chelonia*  
524 *mydas*) Hatchlings. *Chelonian Conserv. Biol.* **10**, 117–123 (2011).
- 525 34. Gross, T. S., Crain, D. a, Bjorndal, K. a, Bolten, a B. & Carthy, R. R.  
526 Identification of sex in hatchling loggerhead turtles (*Caretta caretta*) by  
527 analysis of steroid concentrations in chorioallantoic/amniotic fluid. *General and*  
528 *comparative endocrinology* **99**, 204–210 (1995).
- 529 35. Kaska, Y. *et al.* Sex ratio estimations of loggerhead sea turtle hatchlings by  
530 histological examination and nest temperatures at Fethiye beach, Turkey.  
531 *Naturwissenschaften* **93**, 338–343 (2006).
- 532 36. Marcovaldi, M., Godfrey, M. H. & Mrosovsky, N. Estimating sex ratios of  
533 loggerhead turtles in Brazil from pivotal incubation durations. *Can. J. Zool.* **75**,  
534 755–770 (1997).
- 535 37. Radder, R. S. Maternally derived egg yolk steroid hormones and sex

- 536           determination: review of a paradox in reptiles. *J. Biosci.* **32**, 1213–1220  
537           (2007).
- 538   38.   Groothuis, T. G. G. & Schwabl, H. Hormone-mediated maternal effects in  
539           birds: mechanisms matter but what do we know of them? *Philos. Trans. R.*  
540           *Soc. B Biol. Sci.* **363**, 1647–1661 (2008).
- 541   39.   Brischoux, F., Lourdais, O., Boissinot, A. & Angelier, F. Influence of  
542           temperature, size and confinement on testosterone and corticosterone levels  
543           in breeding male spined toads (*Bufo spinosus*). *Gen. Comp. Endocrinol.* **269**,  
544           75–80 (2018).
- 545   40.   Tschirren, B., Sendecka, J., Groothuis, T. G. G., Gustafsson, L. & Doligez, B.  
546           Heritable Variation in Maternal Yolk Hormone Transfer in a Wild Bird  
547           Population. *Am. Nat.* **174**, 557–564 (2009).
- 548   41.   Stiebens, V. A. *et al.* Living on the edge □: how philopatry maintains adaptive  
549           potential. *Proc. R. Soc.* **280**, 1–9 (2013).
- 550   42.   Mrosovsky, N., Bass, A., Corliss, L. A., Richardson, J. I. & Richardson, T. H.  
551           Pivotal and beach temperatures for hawksbill turtles nesting in Antigua. *Can.*  
552           *J. Zool.* **70**, 1920–1925 (1992).
- 553   43.   Mrosovsky, N., Kamel, S. J., Díez, C. E. & van Dam, R. P. Methods of  
554           estimating natural sex ratios of sea turtles from incubation temperatures and  
555           laboratory data. *Endanger. Species Res.* **8**, 147–155 (2009).
- 556   44.   Wibbels, T., Hanson, J., Balazs, G., Hillis-Starr, Z.-M. & Phillips, B. Blood  
557           Sampling Techniques for Hatchling Cheloniid Sea Turtles. *Herpetol. Rev.* **29**,  
558           218–220 (1998).
- 559   45.   Girondot, M. Statistical description of temperature-dependent sex  
560           determination using maximum likelihood. *Evol. Ecol. Res.* **1**, 479–486 (1999).
- 561   46.   Schwabl, H. Yolk is a source of maternal testosterone for developing birds.  
562           *Proc. Natl. Acad. Sci. U. S. A.* **90**, 5 (1993).
- 563   47.   Monsinjon, J. *et al.* Embryonic Growth Rate Thermal Reaction Norm of  
564           Mediterranean *Caretta caretta* Embryos from Two Different Thermal Habitats,  
565           Turkey and Libya. *Chelonian Conserv. Biol.* **16**, 172–179 (2017).

- 566 48. Al-Habsi, A. A. *et al.* Plasma hormone levels in the green turtles *Chelonia*  
567 *mydas* during peak period of nesting at Ras Al-Hadd-Oman. *J. Endocrinol.*  
568 **191**, 9–14 (2006).
- 569 49. Rostal, D. C. *et al.* Changes in gonadal and adrenal steroid levels in the  
570 leatherback sea turtle (*Dermochelys coriacea*) during the nesting cycle. *Gen.*  
571 *Comp. Endocrinol.* **122**, 139–147 (2001).
- 572 50. Rostal, D. C., Paladino, F. V., Patterson, R. M. & Spotila, J. R. Reproductive  
573 Physiology of Nesting Leatherback Turtles (*Dermochelys coriacea*) at Las  
574 Baulas National Park , Costa Rica. *Chelonian Conserv. Biol.* **2**, 230–236  
575 (1996).
- 576 51. Dobbs, K. A., Miller, J. D., Owens, D. W. & Landry Jr., A. M. Serum  
577 testosterone and estradiol 17B levels during the peak period in a year-round  
578 hawksbill turtle, *eretmochelys imbricata* L. nesting population. *Pacific Conserv.*  
579 *Biol.* **13**, 151–157 (2007).
- 580 52. Myre, B. L., Guertin, J., Selcer, K. & Valverde, R. A. Ovarian Dynamics in  
581 Free-Ranging Loggerhead Sea Turtles ( *Caretta caretta* ). *Copeia* **104**, 921–  
582 929 (2016).
- 583 53. Kobayashi, S. *et al.* The effects of nest incubation temperature on embryos  
584 and hatchlings of the loggerhead sea turtle: Implications of sex difference for  
585 survival rates during early life stages. *J. Exp. Mar. Bio. Ecol.* **486**, 274–281  
586 (2017).

587

588

589

590

591

592

593

594

595

596

597

598

599

600 **Figures**

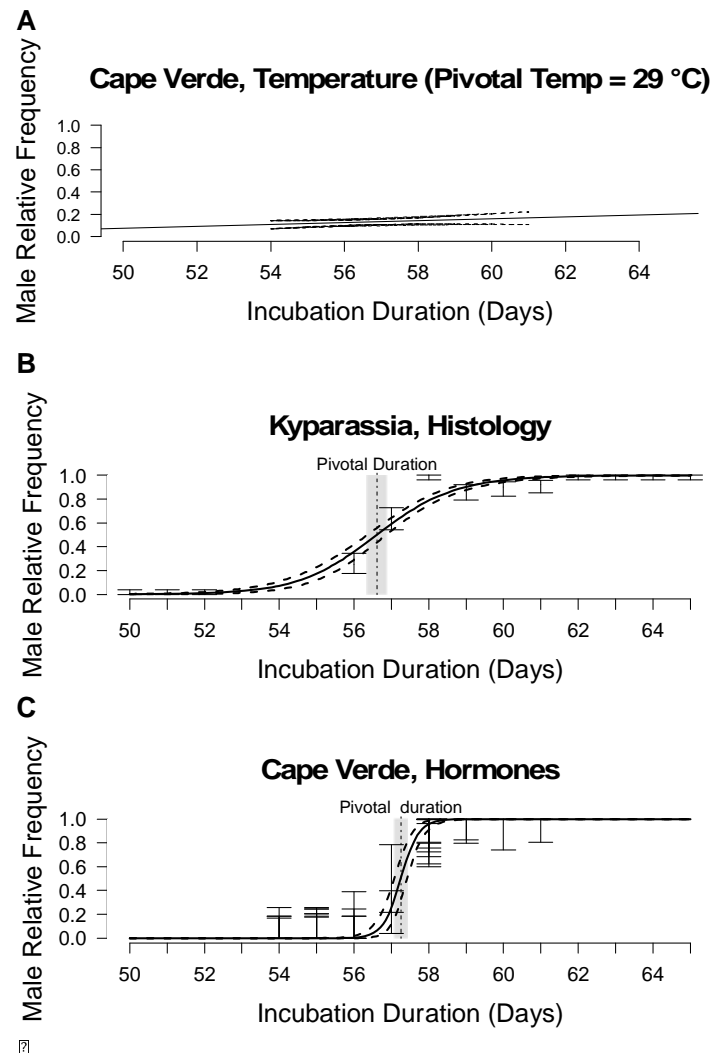

601

602 **Fig. 1: Sex ratios of study clutches A) as would be expected with a pivotal**  
603 **temperature of 29 °C B) based on the relationship between incubation duration**  
604 **and clutch sex ratios in Kyparassia (Greece)<sup>30</sup> and C) as experimentally**  
605 **determined by hormone profiles and machine learning algorithm of individual**  
606 **offspring.**

607

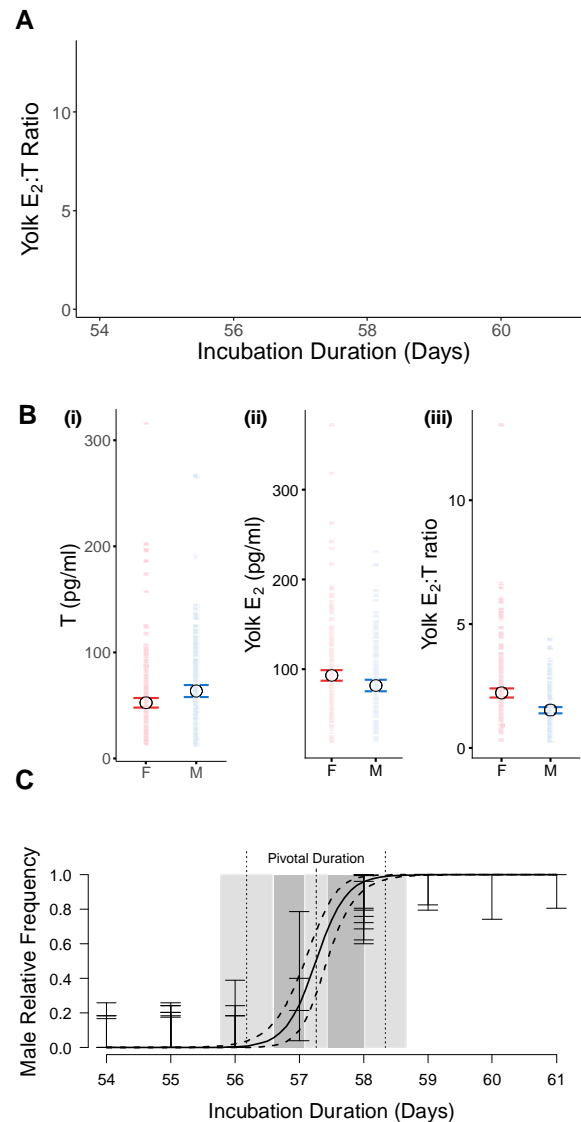

Fig. 2: Individual sex as calculated by affinity propagation clustering (APC). A) APC identifies three different clusters based on individual E<sub>2</sub>:T ratio and clutch incubation duration. These clusters equate to female (red and black) and male (blue) offspring; B) Significant differences in the concentrations of T ( $F_{1,60} = 10.673$ ,  $p = 0.002$ ), E<sub>2</sub> ( $F_{1,57} = 7.521$ ,  $p = 0.008$ ) and the E<sub>2</sub>:T ratio ( $F_{1,48} = 28.652$ ,  $p < 0.001$ ) between male and female offspring (mean, 95% confidence intervals and raw data are shown); C) Frequency of male offspring estimated by APC in relation to incubation duration. The pivotal duration was estimated at 57.25 days.

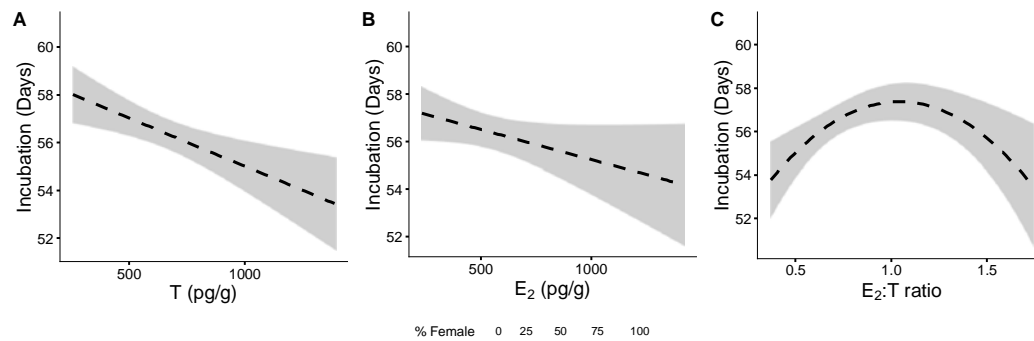

**Fig. 3: Relationship between maternally derived A) T ( $F_{1,22} = 10.624$ ,  $p = 0.003$ ), B)  $E_2$  ( $F_{1,23} = 3.169$ ,  $p = 0.088$ ) and C)  $E_2:T$  ratio ( $F_{1,21} = 12.882$ ,  $p = 0.002$ ) and concentrations within egg yolks and incubation duration. Size of data points relates to the sex ratio as determined by APC.**

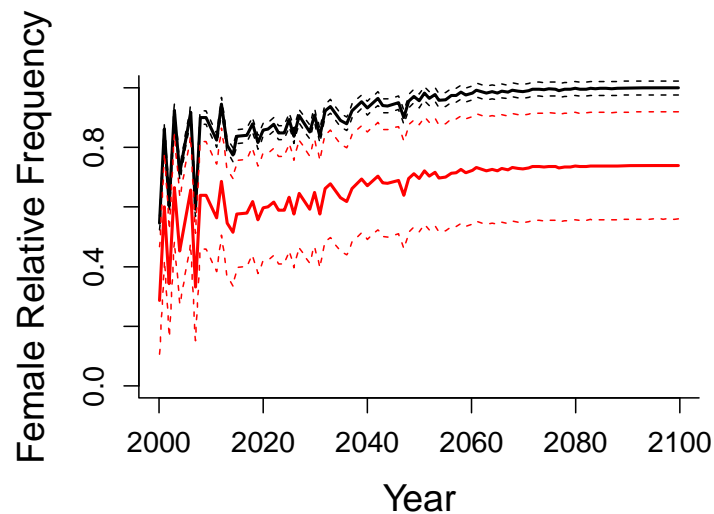

**Fig. 4: The population sex ratio of Cape Verde over the next century if it was determined by temperature alone <sup>4</sup> (black) and incorporating the effect of hormones observed here on the sex determining mechanism (red) along with the 95% confidence intervals.**
